# Supplementary material for: Factors associated with failure of enhanced recovery protocol in patients undergoing major hepatobiliary and pancreatic surgery: a retrospective cohort study
Source: PubMed Central journal article supplement — BMJ Open. 2014 Jul 10;4(7):e005330. doi: 10.1136/bmjopen-2014-005330 (PMC4120378; doi:10.1136/bmjopen-2014-005330), 2014-07-10
Supplement: bmjopen-2014-005330.draft_revisions.pdf [file bmjopen-2014-005330.draft_revisions.pdf]

# BMJ Open

## Factors associated with failure of enhanced recovery protocol in patients undergoing major hepatobiliary and pancreatic surgery: a cohort study

|                                 |                                                                                                                                                                                                                                                                                                                                                                                                                                                                                                                                                                                                                                                                                        |
|---------------------------------|----------------------------------------------------------------------------------------------------------------------------------------------------------------------------------------------------------------------------------------------------------------------------------------------------------------------------------------------------------------------------------------------------------------------------------------------------------------------------------------------------------------------------------------------------------------------------------------------------------------------------------------------------------------------------------------|
| Journal:                        | <i>BMJ Open</i>                                                                                                                                                                                                                                                                                                                                                                                                                                                                                                                                                                                                                                                                        |
| Manuscript ID:                  | bmjopen-2014-005330                                                                                                                                                                                                                                                                                                                                                                                                                                                                                                                                                                                                                                                                    |
| Article Type:                   | Research                                                                                                                                                                                                                                                                                                                                                                                                                                                                                                                                                                                                                                                                               |
| Date Submitted by the Author:   | 24-Mar-2014                                                                                                                                                                                                                                                                                                                                                                                                                                                                                                                                                                                                                                                                            |
| Complete List of Authors:       | Lee, Anna; The Chinese University of Hong Kong, Anaesthesia and Intensive Care<br>Chiu, Chun Hung; The Chinese University of Hong Kong, Anaesthesia and Intensive Care<br>Cho, Mui Wai Amy; The Chinese University of Hong Kong, Anaesthesia and Intensive Care<br>Gomersall, Charles; The Chinese University of Hong Kong, Anaesthesia and Intensive Care<br>Lee, Kit Fai; The Chinese University of Hong Kong, Division of Hepatobiliary and Pancreatic Surgery<br>Cheung, Yue Sun; The Chinese University of Hong Kong, Division of Hepatobiliary and Pancreatic Surgery<br>Lai, Paul Bo San; The Chinese University of Hong Kong, Division of Hepatobiliary and Pancreatic Surgery |
| <b>Primary Subject Heading</b>: | Gastroenterology and hepatology                                                                                                                                                                                                                                                                                                                                                                                                                                                                                                                                                                                                                                                        |
| Secondary Subject Heading:      | Health services research, Surgery                                                                                                                                                                                                                                                                                                                                                                                                                                                                                                                                                                                                                                                      |
| Keywords:                       | Hepatobiliary surgery < SURGERY, Risk management < HEALTH SERVICES ADMINISTRATION & MANAGEMENT, Protocols & guidelines < HEALTH SERVICES ADMINISTRATION & MANAGEMENT                                                                                                                                                                                                                                                                                                                                                                                                                                                                                                                   |

SCHOLARONE™  
Manuscripts

1  
2  
3 **Factors associated with failure of enhanced recovery protocol in patients**  
4  
5 **undergoing major hepatobiliary and pancreatic surgery: a cohort study**  
6  
7

8  
9 Anna LEE<sup>1</sup>, Chun Hung CHIU<sup>1</sup>, Mui Wai Amy CHO<sup>1</sup>, Charles David  
10 GOMERSALL<sup>1</sup>, Kit Fai LEE<sup>2</sup>, Yue Sun CHEUNG<sup>2</sup>, Paul Bo San LAI<sup>2</sup>  
11  
12

13  
14  
15  
16 <sup>1</sup> Department of Anaesthesia and Intensive Care, Prince of Wales Hospital, The  
17 Chinese University of Hong Kong  
18

19  
20 <sup>2</sup> Division of Hepatobiliary and Pancreatic Surgery, Department of Surgery, Prince of  
21 Wales Hospital, The Chinese University of Hong Kong  
22  
23

24  
25  
26  
27 **Address for correspondence:** Anna Lee, Department of Anaesthesia and  
28 Intensive Care, Prince of Wales Hospital, The Chinese University of Hong Kong,  
29 Shatin, New Territories, Hong Kong  
30  
31  
32  
33  
34 Phone: +852 2632 2735 Fax: +852 2637 2422 Email: [annalee@cuhk.edu.hk](mailto:annalee@cuhk.edu.hk)  
35  
36

37  
38 **Reprints:** Reprints will not be available from the authors  
39

40 **Category:** Research article  
41

42  
43 **Meeting:** Will be presented in part at the combined Royal Australasian College of  
44 Surgeons Annual Scientific Congress and the Australian and New Zealand College  
45 of Anaesthetists and Faculty of Pain Medicine Annual Scientific Meeting, in  
46 Singapore, 5<sup>th</sup>-9<sup>th</sup> May 2014.  
47  
48  
49

50  
51 **MESH terms:** Enhanced recovery after surgery; Postoperative care; Liver surgery;  
52 Pancreatic surgery; Cohort  
53  
54

55  
56 **Word count:** 245 (abstract); 3043 (text)  
57  
58  
59  
60

## ABSTRACT

**Background:** Enhanced recovery after major hepatobiliary and pancreatic (HBP) surgery have been shown to reduce postoperative morbidities, length of hospital stay and costs but compliance with core elements varies considerably among centers.

This study examined risk factors associated with failure of enhanced recovery protocol after HBP surgery to identify patients needing additional care to minimize perioperative morbidities and length of stay.

**Methods:** A cohort of 194 patients undergoing major HBP surgery was followed up for 30 days. The primary outcome was failure of enhanced recovery protocol, which was defined as a composite measure of the following events: intensive care unit (ICU) stay more than 24 hours after surgery, unplanned admission to ICU within 30 days after surgery, hospital readmission, reoperation and mortality.

**Results:** There were 25 failures of enhanced recovery after HBP surgery (12.9%, 95% CI, 8.5% to 18.4%). After adjusting for elective ICU admission, smokers (RR 2.21, 95% CI, 1.10 to 4.46), high preoperative alanine transaminase/glutamic-pyruvic transaminase (RR 3.55, 1.68 to 7.49) and postoperative morbidities (RR 2.69, 95% CI, 1.30 to 5.56) were associated with failures of enhanced recovery in the generalized estimating equation risk model. Compared to those managed successfully, failures stayed longer in ICU (median 19 vs. 25 hours,  $P<0.001$ ) and in hospital for postoperative care (median 7 vs. 13 days,  $P=0.003$ ).

**Conclusion:** Smokers and patients having high preoperative alanine transaminase/glutamic-pyruvic transaminase concentration or have a high risk of postoperative morbidities are likely to fail enhanced recovery protocol in HBP surgery programs.

### Strengths and limitations of this study

- This is the first study to identify risk factors associated with the failure of enhanced recovery protocol in major hepatobiliary and pancreatic surgery.
- Instead of using length of hospital stay as an endpoint, failure was defined as a composite measure of slow recovery: length of stay in the intensive care unit (ICU) more than 24 hours after surgery, unplanned admission to ICU within 30 days, readmission to the hospital within 30 days after surgery, reoperation for complications and 30-day mortality
- Smokers (defined by self-reported history and urinary cotinine concentration) and patients having high preoperative alanine transaminase glutamic-pyruvic transaminase concentration or have a high risk of postoperative morbidities are likely to fail clinical pathways in fast-track hepatobiliary and pancreatic surgery.
- We did not consider the compliance rate of individual components of the early recovery after hepatobiliary pancreatic surgery program
- High risk patients at risk of failing enhanced recovery protocols in major hepatobiliary pancreatic surgery may benefit from additional care to minimize perioperative morbidities and length of stay.

## INTRODUCTION

Enhanced recovery after major hepatobiliary and pancreatic surgery (ERAHBPS) is a complex intervention that includes many of the following components: patient and family education, no bowel preparation, no preanaesthetic medication, preoperative carbohydrate loading, thromboembolic prophylaxis, antiemetic prophylaxis, epidural analgesia, intraoperative normothermia, prophylactic antibiotics, no systemic opioids, fluid restriction, no surgical drains, no standard postoperative nasogastric tubes, postoperative nutritional care and early mobilization.[1]

Recent systematic reviews[1,2] of several observational studies of ERAHBPS programs suggest that it is safe and feasible. Compared to traditional clinical pathways, fast-track hepatobiliary and pancreatic (HBP) surgery programs have similar risks of readmission, morbidity and mortality[1-3] and reduced the duration of postoperative length of stay and overall hospital cost.[3] However, compliance with core components of enhance recovery after liver surgery program vary between high-volume European centers, with a median adoption of 9 (range 7 to 12) of 22 core elements.[4]

As with all enhanced recovery after surgery (ERAS) programs, a small proportion of patients will fail fast-track HBP surgery and require additional intensive care unit (ICU) resources. Although not all fast-track HBP surgical patients are routinely admitted to ICU after their procedure,[5,6] ICU care after liver resection was associated with a decreased risk in hospital mortality (odds ratio 0.26, 95% CI 0.10 to 0.71) and a reduction in total hospital costs (13%).[7] These results suggest that

1  
2  
3 careful selection of patients for ERAHBPS is crucial for maximizing the efficiency of  
4  
5 perioperative care pathways.  
6  
7

8  
9  
10 Fast-track failure risk models after cardiac surgery have been developed[8] and  
11  
12 externally validated[9] to facilitate the planning of perioperative care pathways, but  
13  
14 factors associated with failure of enhanced recovery protocol after HBP surgery are  
15  
16 unknown. The objectives of this study were to estimate the incidence of and identify  
17  
18 the risk factors associated with failure of enhanced recovery protocol after HBP  
19  
20 surgery. And with such information, we can identify a subgroup of patients at risk of  
21  
22 failure to provide additional care to minimize perioperative morbidities and length of  
23  
24 stay.  
25  
26  
27

## 28 29 **METHODS**

### 30 31 **Study cohort**

32  
33  
34 The Joint Chinese University of Hong Kong-New Territories East Cluster Clinical  
35  
36 Research Ethics Committee approved this cohort study of patients undergoing major  
37  
38 HBP surgery at the Prince of Wales Hospital in Hong Kong between January 2011  
39  
40 and November 2012 (CRE-2013.181). The patients were from a larger cohort study  
41  
42 of 736 consecutive adult patients with preoperative urinary cotinine concentration to  
43  
44 examine the association between passive smoking and risk of perioperative  
45  
46 respiratory complications and postoperative morbidities.[10] All patients gave written  
47  
48 informed consent before surgery. Patients undergoing other types of surgery, unable  
49  
50 to give written informed consent, having chronic renal failure, younger than 18 years  
51  
52 and urine cotinine samples collected more than 48 h before surgery were excluded.  
53  
54  
55  
56  
57  
58  
59  
60

1  
2  
3 The types of surgery included were laparoscopic liver resection (nonanatomical  
4 wedge resections, or resection of 1 or 2 segments), minor open liver resection (fewer  
5 than 3 segments including multiple non-anatomical resections), major open liver  
6 resections (3 or more segments), liver resection with biliary reconstruction[11,12]  
7 and pancreatic surgery. Pancreatic surgery included Whipple procedure, double  
8 bypass (hepaticojejunostomy and gastrojejunostomy in unresectable cancer of the  
9 head of pancreas) and distal pancreatectomy.  
10  
11  
12  
13  
14  
15  
16  
17  
18  
19

### 20 21 **Typical management**

22 The typical clinical care pathway for HBP surgical patients involved the following:  
23 admission to surgical ward one day before surgery, patient education, no  
24 preanaesthetic medication, mechanical prophylaxis for deep vein thrombosis,  
25 intraoperative prophylactic antibiotics, normothermia during surgery, ICU or surgical  
26 ward for first 24 h after surgery, surgical ward, early mobilization and hospital  
27 discharge. Patient controlled analgesia was regularly prescribed to patients  
28 undergoing open HBP surgery. For pancreatic surgery, abdominal drains and  
29 nasogastric tubes were routinely placed and kept in place for at least 2 to 3 days  
30 after surgery. The use of epidural anaesthesia is not routine because of concerns  
31 about postoperative coagulopathy in patients with cirrhosis of liver.  
32  
33  
34  
35  
36  
37  
38  
39  
40  
41  
42  
43  
44  
45  
46  
47  
48  
49  
50  
51  
52  
53  
54  
55  
56  
57  
58  
59  
60

Although there was no formalized extubation protocol, extubation at the end of liver  
resection surgery or within 1 h after admission to ICU was expected; for pancreatic  
surgery where most patients went to ICU, extubation within 4 h was expected. There  
is no surgical high dependency unit at the Prince of Wales Hospital, Hong Kong.

## Outcome Measure

For the purposes of this study, we define failure of enhanced recovery protocol after HBP surgery as a composite measure of the following events: length of ICU stay more than 24 h after surgery, unplanned admission to ICU within 30 days after surgery, readmission to the hospital within 30 days after surgery, reoperation for complications and 30-day mortality. These events were chosen as markers of slow recovery. Unlike previous ERAS studies, we did not chose length of stay as a primary outcome as it has been shown that reductions in length of stay up to a median of 2 days may be related to changes in organization of care and not to the effect of the ERAS program.[13]

We collected patient demographics, smoking status, preoperative urinary cotinine concentration that was adjusted for creatinine level, American Society of Anesthesiologists' Physical Status, Surgical Apgar score,[14] duration of surgery, ICU admission details, APACHE II (severity of illness score in patients admitted to ICU),[15] preoperative liver function tests, indocyanine green test and coagulation tests, and failure events from the hospital electronic Clinical Management System database. The research staff collected postoperative morbidities (pulmonary, infectious, renal, gastrointestinal, cardiovascular, neurological, haematological, wound and severe pain) on the third day after surgery using a reliable and valid Postoperative Morbidity Survey questionnaire.[16] The EQ-5D index, a health-related quality of life using a US set of reference weights, was measured on the third day after surgery[17] as the greatest difference in EQ-5D index between ERAHBPS and standard care occur between postoperative day 2 and 5.[18] Current smoking was defined as no smoking cessation within 2 months before surgery or the patient had



1  
2  
3 an adjusted urinary cotinine concentration  $\geq 550$  ng/mL within 48 hours before  
4  
5 surgery.[10] The research staff was blinded to the urinary cotinine concentration  
6  
7 results.  
8  
9

### 10 11 12 **Statistical Analysis**

13  
14 Continuous data were expressed as mean and standard deviation (SD) or median  
15  
16 and interquartile range (IQR). The 95% confidence interval (95% CI) was estimated  
17  
18 around the incidence of HBP surgery failure. Appropriate Student t-tests, Mann-  
19  
20 Whitney U tests,  $\chi^2$  analyses or exact tests were used to compare factors associated  
21  
22 with failure of enhanced recovery protocol. To adjust for multiple testing of individual  
23  
24 postoperative morbidity events, a Bonferroni correction was used so that the  
25  
26 significance criterion was set at  $P < 0.0063$ . There was no missing data.  
27  
28  
29

30  
31  
32 A generalized estimating equation (GEE) model with a Poisson distribution, log-link  
33  
34 function and exchangeable correlation[19] was used to obtain a common-effect  
35  
36 relative risk (RR) of failure of enhanced recovery protocol after HBP surgery. This  
37  
38 GEE model was more appropriate for analysis of composite measures and assumes  
39  
40 that there is a single common exposure effect across all components used in the  
41  
42 failure composite endpoint. We included elective ICU admission in the model as we  
43  
44 considered this factor to be clinically important with regards to postoperative bed  
45  
46 utilization. The calibration and discrimination of the model was assessed using the  
47  
48 Hosmer-Lemeshow goodness-of-fit test and estimating the area under the receiver  
49  
50 characteristic operating curve (AUROC). Internal validation of the model was  
51  
52 performed by bootstrapping 1000 samples and estimating the AUROC and 95% CI.  
53  
54  
55  
56  
57  
58  
59  
60

1  
2  
3 Statistical analyses were performed using STATA (version 13.1) software (STATA  
4 Corp, College Station, TX).  
5  
6  
7  
8

9  
10 Using PASS (version 11) software (NCSS, Kaysville, UT), a sample size of 190 (19  
11 failure and 171 success) patients will achieve 80% power to detect a difference of  
12 0.20 between the AUROC under the null hypothesis of 0.70 (fair discrimination) and  
13 an AUROC under the alternative hypothesis of 0.50 (no discrimination) using a 2-  
14 sided z-test at a significance level of 0.05.  
15  
16  
17  
18  
19  
20  
21  
22

## 23 RESULTS

24  
25 Of the 217 consecutive patients undergoing HBP surgery, 23 were not eligible (10  
26 not available in the ward at time of recruitment, 5 refusals, 4 already participated in  
27 the study, 3 unable to consent and 1 had renal impairment). There were 25 failures  
28 of enhanced recovery (12.9%, 95% CI, 8.5% to 18.4%) in 194 patients undergoing  
29 major HBP surgery. Of the 94 elective ICU patients, 10 (10.6%) stayed in ICU for  
30 more than 24 hours after surgery. One patient was admitted to ICU unexpectedly  
31 due to surgical emphysema and stayed in ICU for 43 hours after surgery. There were  
32 2 (2.1%) readmissions to ICU within 24 hours (1 for acute renal failure/atrial  
33 fibrillation and 1 for atelectasis), 2 reoperations (1.0%) and 11 hospital readmissions  
34 (11.6%). No patient died within 30 days after surgery.  
35  
36  
37  
38  
39  
40  
41  
42  
43  
44  
45  
46  
47  
48  
49

50 The median postoperative length of hospital stay was longer in the failure group (13  
51 days, 7 to 18) than in the successful group (7 days, 6 to 9) (P=0.003). This was  
52 mainly due to longer median length of postoperative hospital stay in patients  
53 undergoing hepatic surgery failing enhanced recovery management (12 days, 7 to  
54  
55  
56  
57  
58  
59  
60

17) compared to those successfully managed (7 days, 6 to 9) ( $P=0.001$ ). There were 26 patients undergoing pancreatic surgery. The median duration of postoperative hospital stay in patients undergoing pancreatic surgery failing and succeeding enhanced recovery management were 16 (5 to 35) and 10 (8 to 18) days, respectively ( $P=0.716$ ). The median time from initial hospital discharge to readmission was 6 days (2 to 13).

The demographic and preoperative characteristics associated with failure of enhanced recovery protocol are shown in Table 1. Of the 137 patients with preoperative indocyanine green test results, 14 (7.2%) were classified as borderline and 4 (2.1%) were poor. There was no significant association between indocyanine green test results and failure groups ( $P=0.735$ ).

Table 1. Demographic and preoperative factors associated with failure of enhanced recovery protocol after major hepatobiliary and pancreatic surgery

|                                                               | Enhanced Recovery Protocol Groups |                       | P value |
|---------------------------------------------------------------|-----------------------------------|-----------------------|---------|
|                                                               | Failure (n=25)                    | Success (n=169)       |         |
| Mean age (SD), y                                              | 57 (11)                           | 59 (11)               | 0.498   |
| Males, n (%)                                                  | 19 (76)                           | 131 (78)              | 0.866   |
| American Society of Anesthesiologists' Physical Status, n (%) |                                   |                       |         |
| I                                                             | 2 (8)                             | 25 (15)               | 0.512   |
| II                                                            | 18 (72)                           | 121 (72)              |         |
| III/IV                                                        | 5 (20)                            | 23 (14)               |         |
| Current smoker, n (%)                                         | 9 (36)                            | 35 (21)               | 0.088   |
| Median adjusted cotinine, ng/mL (IQR)                         | 1.34<br>(0.60 – 265.82)           | 1.07<br>(0.55 – 3.51) | 0.183   |
| Type of Surgery, n (%)                                        |                                   |                       |         |
| Exploratory                                                   | 1 (4)                             | 5 (3)                 | 0.441   |
| Laparoscopic liver resection                                  | 3 (12)                            | 28 (17)               |         |
| Minor open liver resection                                    | 5 (20)                            | 62 (37)               |         |
| Major open liver ± biliary reconstruction                     | 12 (48)                           | 52 (31)               |         |
| Whipple                                                       | 2 (8)                             | 15 (9)                |         |
| Other pancreatic surgery                                      | 2 (8)                             | 7 (4)                 |         |
| Magnitude of Surgery, n (%)                                   |                                   |                       |         |
| Major                                                         | 4 (16)                            | 36 (21)               | 0.541   |
| Ultramajor                                                    | 21 (84)                           | 133 (79)              |         |
| Low albumin (<35 g/L), n (%)                                  | 2 (4)                             | 12 (7)                | 0.698   |
| High bilirubin ( $\mu\text{mol/L}$ )*, n(%)                   | 7 (28)                            | 27 (16)               | 0.159   |

|                                              |         |          |       |
|----------------------------------------------|---------|----------|-------|
| Alkaline Phosphatase (IU/L), n (%)           |         |          |       |
| Normal <sup>†</sup>                          | 14 (56) | 123 (73) |       |
| Low                                          | 1 (4)   | 3 (2)    | 0.214 |
| High                                         | 10 (40) | 43 (25)  |       |
| High ALT/GPT(IU/L) <sup>‡</sup> , n (%)      | 11 (44) | 23 (14)  | 0.001 |
| Haemoglobin (g/dL), n (%)                    |         |          |       |
| Normal <sup>§</sup>                          | 14 (56) | 121 (72) |       |
| Low                                          | 10 (40) | 46 (27)  | 0.211 |
| High                                         | 1 (4)   | 2 (1)    |       |
| Platelets, n (%)                             |         |          |       |
| Normal (150-384 x 10 <sup>9</sup> /L)        | 14 (56) | 117 (69) |       |
| Low                                          | 10 (40) | 50 (30)  | 0.294 |
| High                                         | 1 (4)   | 2 (1)    |       |
| Prothrombin time, n (%)                      |         |          |       |
| Normal (9.5-12 s)                            | 19 (76) | 144 (85) |       |
| Low                                          | 0 (0)   | 1 (1)    | 0.423 |
| High                                         | 6 (24)  | 24 (14)  |       |
| Activated partial thromboplastin time, n (%) |         |          |       |
| Normal (28.2-37.4 s)                         | 22 (88) | 153 (91) |       |
| Low                                          | 2 (8)   | 10 (6)   | 0.914 |
| High                                         | 1 (4)   | 6 (4)    |       |
| High International Normalised Ratio, n (%)   | 0 (0)   | 2 (1)    | 1.000 |
| Urinary Creatinine (µmol/L), n (%)           |         |          |       |
| Normal <sup>†</sup>                          | 20 (80) | 143 (85) |       |
| Low                                          | 3 (12)  | 17 (10)  | 0.815 |
| High                                         | 2 (8)   | 9 (5)    |       |

\*High bilirubin defined as more than 19µmol/L in males, and more than 17µmol/l in females

<sup>†</sup>Age and gender specific range

<sup>‡</sup>High Alanine transaminase/glutamic-pyruvic transaminase defined as more than 67 IU/L in males and more than 55 IU/L in females

<sup>§</sup>Normal range is 13.2 to 17.2g/dL for males and 11.9 to 15.1g/dL for females

The median duration of hepatic surgery was similar between failure (270 min, 186 to 336) and successful enhanced recovery groups (236 min, 180 to 315) (P=0.348).

There was no difference in the median duration of pancreatic surgery between failure (395 min, 192 to 641) and successful enhanced recovery groups (488 min, 291 to 560) (P=0.933). The median Surgical Apgar Score was similar between failure (8, 6 to 9) and successful (8, 7 to 9) enhanced recovery groups (P=0.912).

Elective ICU admissions occurred in 13 (41.9%) patients undergoing laparoscopic liver resection, 19 (23.9%) minor open liver resection, 45 (70.3%) major open liver and/or biliary reconstruction, 15 (88.2%) Whipple and 2 (22.2%) other pancreatic surgery. Of the 94 elective ICU admissions, 17 (18.1%) patients failed enhanced

recovery protocols after HBP surgery. Patients with elective ICU admissions were more likely to be enhanced recovery failures than patients sent to the ward after surgery ( $RR_{unadjusted}$  1.49, 95% CI, 1.09 to 2.05). The median duration of ICU length of stay was longer in the failure group (25 hours, 20 to 39) than in the successful enhanced recovery group (19 hours, 17 to 22) ( $P < 0.001$ ). However, the mean APACHE II score was similar between failure ( $13.6 \pm 3.8$ ) and successful ( $12.3 \pm 3.5$ ) enhanced recovery groups ( $P = 0.150$ ).

The overall incidence of postoperative morbidities was 35.1% (95% CI, 28.4% to 42.2%). There was no reported wound dehiscence (requiring surgical exploration or drainage of pus from the operation wound with or without isolation of organisms)[16] on the third postoperative day. There was no difference in the incidence of postoperative morbidities between groups according to the *a priori* Bonferroni-correction P value criterion (Figure 1). Patients with a postoperative morbidity were twice as likely to be a failure ( $RR_{unadjusted}$  2.36, 95% CI, 1.13 to 4.91) than those without. There was no difference in the mean EQ-5D index between failure ( $0.53 \pm 0.30$ ) and successful enhanced recovery groups ( $0.63 \pm 0.29$ ) ( $P = 0.166$ ).

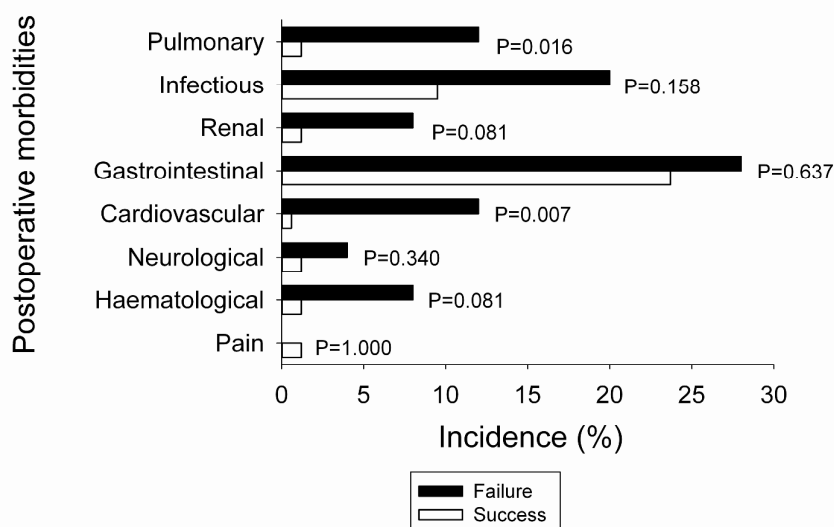

After adjusting for planned postoperative ICU care, current smoking, high preoperative alanine transaminase/glutamic-pyruvic transaminase concentration and postoperative morbidities on the third day after surgery were significant risk factors associated with failure of enhanced recovery protocol (Table 2). The GEE model had adequate calibration (Hosmer-Lemeshow goodness-of-fit  $\chi^2$  8df, P=0.352) and excellent discrimination (AUROC = 0.87, 95% CI, 0.83 to 0.92).

Table 2. Risk factors for failure in enhanced recovery protocol after major hepatobiliary and pancreatic surgery using the generalized estimating equation model

|                             | Common-effect RR (95% CI) | P value |
|-----------------------------|---------------------------|---------|
| ICU admission               |                           |         |
| None                        | 1.00                      |         |
| Elective                    | 0.41 (0.14 – 1.20)        | 0.104   |
| Smoking status              |                           |         |
| Never-smoker/Exsmoker       | 1.00                      |         |
| Current smoker              | 2.21 (1.10 – 4.46)        | 0.027   |
| ALT/GPT(IU/L)*              |                           |         |
| Normal                      | 1.00                      |         |
| High                        | 3.55 (1.68 – 7.49)        | 0.001   |
| Any postoperative morbidity |                           |         |
| None                        | 1.00                      |         |
| Present on Day 3            | 2.69 (1.30 – 5.56)        | 0.007   |

\* High Alanine transaminase/glutamic-pyruvic transaminase defined as more than 67 IU/L in males and more than 55 IU/L in females

## DISCUSSION

Our management of patients undergoing HBP surgery incorporated a small proportion of evidence-based components described in ERAS programs for hepatic[4] and pancreatic[20] surgery. For every eight patients undergoing major HBP surgery, one was at risk of failing enhanced recovery protocols in major HBP surgery. However, no patients died within 30 days after surgery. Prolonged stay in ICU (12%) and hospital readmissions (6%) were the most common failure events.

1  
2  
3 Our hospital readmission rate and 30-day mortality are within the range described in  
4 studies included in recent systematic reviews of fast-track liver resection and  
5 pancreatic surgery.[1,2,20,21] Our patients who failed enhanced recovery protocols  
6 after major HBP surgery had clinically significantly longer ICU stays and  
7 postoperative stays in hospital.  
8  
9  
10  
11  
12

13  
14  
15  
16 Under half (48.5%) of our patients had elective ICU admission after surgery. Patients  
17 with elective ICU admissions after surgery were high-risk patients as suggested by  
18 the results of the univariate analysis where they were 1.5 times more likely to be  
19 failures than patients sent to the ward after surgery. However, when the elective ICU  
20 admission variable was included in the GEE model, the common-effect relative risk,  
21 although not significant ( $P=0.104$ ), suggested a possible protective effect on failure.  
22  
23 A previous study showed that intensive care physician staffing was associated with  
24 better outcomes after hepatic resection from prompt diagnosis and treatment of  
25 nonsurgical complications.[7] Our incidence of ICU readmission (2.1%) within 24 h  
26 appears acceptable. Previous studies included in systematic reviews of fast-track  
27 HBP surgery[1,2,20,21] have not reported the rate of ICU readmissions.  
28  
29  
30  
31  
32  
33  
34  
35  
36  
37  
38  
39  
40  
41  
42

43 There is a paucity of studies examining the effect of smoking on fast-track surgery.  
44 Compared to conventional care programs, smoking was associated with 30-day  
45 hospital readmissions (odds ratio 1.60, 95% CI, 1.05 to 2.44), but not with prolonged  
46 length of hospital stay of more than 4 days (odds ratio 1.34, 95% CI, 0.92 to 1.95) in  
47 patients undergoing fast-track hip and knee arthroplasty.[22] However, current  
48 smoking was based on self-reported smoking history up to a month before  
49 hospital[22] and the effect of smoking on enhanced recovery failure is likely to be  
50  
51  
52  
53  
54  
55  
56  
57  
58  
59  
60

1  
2  
3 underestimated as many smokers (17%) deny smoking before elective surgery.[23]  
4  
5 In contrast, we used both self-reported smoking history and adjusted urinary cotinine  
6  
7 concentration to increase the accuracy of preoperative smoking status data. We  
8  
9 have shown that current smokers were up to four times more likely to be enhanced  
10  
11 recovery failures compared to never-smokers and former smokers in the GEE model.  
12  
13 Thus, smoking cessation before HBP surgery would be expected to decrease the  
14  
15 risk of enhanced recovery failures substantially. Smoking cessation at least 4 weeks,  
16  
17 and preferably 8 weeks, before surgery significantly reduced the risk of postoperative  
18  
19 respiratory and wound-healing complications.[24] Smoking is a modifiable risk factor  
20  
21 that surgeons and anaesthesiologists can work on when patients are booked for  
22  
23 surgery.  
24  
25  
26  
27  
28

29  
30 Of all the preoperative liver function and coagulation tests performed, high alanine  
31  
32 transaminase/glutamic-pyruvic transaminases (ALT/GPT) concentration was the only  
33  
34 independent biochemical risk factor associated with enhanced recovery failures. The  
35  
36 strong association is indicative of the high risk of operating on an acutely inflamed  
37  
38 liver.[25] A previous study[26] found that alanine aminotransferase  $\geq 70$  IU/L was an  
39  
40 independent risk factor (odd ratio 2.02, 95% CI, 1.33 to 3.07) for postoperative  
41  
42 complications after hepatic resection for hepatocellular carcinoma.  
43  
44  
45  
46  
47

48 Fast-track open liver resection was associated with a reduction in general  
49  
50 complications as defined by the Postoperative Morbidity Survey[16] by 36% (95% CI  
51  
52 16% to 52%).[18] A direct comparison between our incidence of postoperative  
53  
54 morbidities on the third day after surgery and Jones et al.'s study[18] is difficult as  
55  
56 the timing of their postoperative morbidities was not specified. Our GEE model found  
57  
58  
59  
60



1  
2  
3 that patients with any postoperative morbidity on the third day after surgery were  
4  
5 three times more likely to be an enhanced recovery failure than patients without  
6  
7 reported postoperative morbidity. Specifically, after adjustment for multiple testing,  
8  
9 cardiovascular events (diagnostic tests or treatment in last 24 h for new myocardial  
10  
11 infarction or ischaemia, hypotension, arrhythmias, cardiogenic pulmonary oedema or  
12  
13 thrombotic events)[16] was weakly associated with the risk of failure.  
14  
15  
16  
17

18  
19 Using a minimal important difference of 0.03,[27] we found that patients in the  
20  
21 enhanced recovery failure group had lower health-related quality of life than in the  
22  
23 successful group. Our health-related quality of life on the third day after surgery in  
24  
25 the successful group was similar to those reported in the standard care group by  
26  
27 Jones et al.[18] Our practice does not include carbohydrate drink up to 2 hours  
28  
29 before surgery, pharmacological prophylaxis for deep vein thrombosis or the routine  
30  
31 use of epidural anaesthesia.  
32  
33  
34  
35

36  
37 Overall, the results of this study suggest that it is possible to identify a subgroup of  
38  
39 patients requiring additional care to minimize perioperative morbidity and length of  
40  
41 stay. Patients who are smokers, have high ALT/GPT concentration or are at a high  
42  
43 risk of postoperative morbidities are likely to fail enhanced recovery protocol in HBP  
44  
45 surgery. In defining who is at high risk of postoperative morbidities, the American  
46  
47 Society of Anesthesiologists' Physical Status grades III and IV and risk more than 50%  
48  
49 estimated in the POSSUM-defined postoperative morbidity model may be useful as  
50  
51 surrogate markers.[16] For those patients at high risk of HBP surgery failure, elective  
52  
53 postoperative ICU admission and measures targeted to avoid postoperative  
54  
55  
56  
57  
58  
59  
60

1  
2  
3 cardiorespiratory complications are warranted to reduce the risk of failure of  
4  
5 enhanced recovery events.  
6  
7  
8

9  
10 There are several limitations of this study. First, we did not measure the compliance  
11 rate of individual components of the ERAHBPS program. Recent studies suggest  
12 that better patient care and outcome can be achieved regardless of the number, the  
13 combination, the type, and the strength of evidence of the individual ERAS  
14 component.[28,29] Second, the common-effects GEE analysis was influenced by the  
15 higher frequencies of prolonged ICU length of stay (12%) and hospital readmissions  
16 (6%) events than other components included in the definition of failure. Our sample  
17 size was small for the use an average relative-effect GEE analysis[19] to address  
18 this problem. There is a potential for residual confounding despite the use of  
19 multivariate analyses in this cohort study. The applicability of the identified risk  
20 factors to select patients suitable for ERAHBPS programs in other settings requires  
21 further validation. Finally, the failure outcomes were limited to the early to  
22 intermediate phases of recovery; we did not measure late recovery outcomes, such  
23 as functional status and health-related quality of life beyond one month as  
24 recommended recently by Neville et al.[30]  
25  
26  
27  
28  
29  
30  
31  
32  
33  
34  
35  
36  
37  
38  
39  
40  
41  
42  
43  
44

45 In conclusion, patients who smoked, had elevated preoperative ALT/GPT or  
46 experienced postoperative morbidities were at risk of failing enhanced recovery  
47 protocols in major HBP surgery and may benefit from additional care. Patients who  
48 failed enhanced recovery protocols in HBP surgery stayed in ICU and in the hospital  
49 longer.  
50  
51  
52  
53  
54  
55  
56  
57  
58  
59  
60

## Acknowledgements

**Funding Support:** The work was substantially supported by the Health and Health Services Research Fund, Food and Health Bureau, Hong Kong SAR Government (Grant number: 08090311). The funding source had no role in the design, conduct or analysis of the study, or in the decision to submit the manuscript for publication.

**Competing Interests:** None declared.

**Ethics approval:** The Joint Chinese University of Hong Kong-New Territories East Cluster Clinical Research Ethics Committee approved this cohort study of patients undergoing major HBP surgery at the Prince of Wales Hospital in Hong Kong between January 2011 and November 2012 (CRE-2013.181).

**Contributors:** AL performed the statistical analyses and had full access to all the data in the study. AL drafted the manuscript and made substantial revisions. All authors were involved in the study concept and design of the study. CHC collected the data. AL, MWAC, CDC, KFL, YSC and BSPL interpreted the data. All authors made critical revisions of the manuscript for important intellectual content and approved the final version of the manuscript. AL is guarantor.

**Data sharing:** No additional data available

**Provenance and peer review:** Not commissioned, externally peer reviewed.

## REFERENCES

1. Spelt L, Ansari D, Stureson C, et al. Fast-track programmes for hepatopancreatic resections: where do we stand? *HPB (Oxford)* 2011;13:833-8.
2. Hall TC, Dennison AR, Bilku DK, et al. Enhanced recovery programmes in hepatobiliary and pancreatic surgery: a systematic review. *Ann R Coll Surg Engl* 2012;94:318-26.
3. Lin DX, Li X, Ye QW, et al. Implementation of a fast-track clinical pathway decreases postoperative length of stay and hospital charges for liver resection. *Cell Biochem Biophys* 2011;61:413-9.
4. Wong-Lun-Hing EM, van Dam RM, Heijnen LA, et al. Is Current Perioperative Practice in Hepatic Surgery Based on Enhanced Recovery After Surgery (ERAS) Principles? *World J Surg* 2013.
5. Schultz NA, Larsen PN, Klarskov B, et al. Evaluation of a fast-track programme for patients undergoing liver resection. *Br J Surg* 2013;100:138-43.
6. Sanchez-Perez B, Aranda-Narvaez JM, Suarez-Munoz MA, et al. Fast-track program in laparoscopic liver surgery: Theory or fact? *World J Gastrointest Surg* 2012;4:246-50.
7. Dimick JB, Pronovost PJ, Lipsett PA. The Effect of ICU Physician Staffing and Hospital Volume on Outcomes After Hepatic Resection. *J Intens Care Med* 2002;17:41-7.

- 1  
2  
3 8. Constantinides VA, Tekkis PP, Fazil A, et al. Fast-track failure after cardiac  
4 surgery: development of a prediction model. *Crit Care Med* 2006;34:2875-82.  
5  
6  
7
- 8 9. Lee A, Zhu F, Underwood MJ, Gomersall CD. Fast-track failure after cardiac  
9 surgery: external model validation and implications to ICU bed utilization. *Crit*  
10 *Care Med* 2013;41:1205-13.  
11  
12
- 13 10. Lee A, Chui PT, Chiu CH, et al. Risk of perioperative respiratory complications  
14 and postoperative morbidity in a cohort of adults exposed to passive smoking.  
15 *Ann Surg* 2014; Published Online First 6 February 2014. doi:  
16 10.1097/SLA.0000000000000544  
17  
18  
19  
20  
21  
22  
23  
24  
25
- 26 11. Lee KF, Cheung YS, Chong CN, et al. Laparoscopic versus open hepatectomy  
27 for liver tumours: a case control study. *Hong Kong Med J* 2007;13:442-8.  
28  
29  
30
- 31 12. Lee KF, Cheung YS, Wong J, et al. Randomized clinical trial of open  
32 hepatectomy with or without intermittent Pringle manoeuvre. *Br J Surg*  
33 2012;99:1203-9.  
34  
35  
36  
37  
38
- 39 13. Maessen JM, Dejong CH, Kessels AG, von Meyenfeldt MF. Length of stay: an  
40 inappropriate readout of the success of enhanced recovery programs. *World J*  
41 *Surg* 2008;32:971-5.  
42  
43  
44  
45
- 46 14. Reynolds PQ, Sanders NW, Schildcrout JS, et al. Expansion of the surgical  
47 Apgar score across all surgical subspecialties as a means to predict  
48 postoperative mortality. *Anesthesiology* 2011;114:1305-12.  
49  
50  
51  
52  
53
- 54 15. Knaus WA, Draper EA, Wagner DP, Zimmerman JE. APACHE II: a severity of  
55 disease classification system. *Crit Care Med* 1985;13:818-29.  
56  
57  
58  
59  
60

- 1  
2  
3 16. Grocott MP, Browne JP, Van der Meulen J, et al. The Postoperative Morbidity  
4 Survey was validated and used to describe morbidity after major surgery. *J Clin*  
5 *Epidemiol* 2007;60:919-28.  
6  
7  
8  
9
- 10  
11 17. Shaw JW, Johnson JA, Coons SJ. US valuation of the EQ-5D health states:  
12 development and testing of the D1 valuation model. *Med Care* 2005;43:203-20.  
13  
14
- 15  
16 18. Jones C, Kelliher L, Dickinson M, et al. Randomized clinical trial on enhanced  
17 recovery versus standard care following open liver resection. *Br J Surg*  
18 2013;100:1015-24.  
19  
20  
21  
22
- 23  
24 19. Mascha EJ, Sessler DI. Statistical grand rounds: design and analysis of studies  
25 with binary- event composite endpoints: guidelines for anesthesia research.  
26 *Anesth Analg* 2011;112:1461-71.  
27  
28  
29
- 30  
31 20. Coolen MM, van Dam RM, van der Wilt AA, et al. Systematic review and meta-  
32 analysis of enhanced recovery after pancreatic surgery with particular emphasis  
33 on pancreaticoduodenectomies. *World J Surg* 2013;37:1909-18.  
34  
35  
36  
37
- 38  
39 21. Coolen MM, Wong-Lun-Hing EM, van Dam RM, et al. A systematic review of  
40 outcomes in patients undergoing liver surgery in an enhanced recovery after  
41 surgery pathways. *HPB (Oxford)* 2013;15:245-51.  
42  
43  
44  
45
- 46  
47 22. Jorgensen CC, Kehlet H. Outcomes in smokers and alcohol users after fast-  
48 track hip and knee arthroplasty. *Acta Anaesthesiol Scand* 2013;57:631-8.  
49  
50  
51
- 52  
53 23. Lee A, Gin T, Chui PT, et al. The accuracy of urinary cotinine immunoassay test  
54 strip as an add-on test to self-reported smoking before major elective surgery.  
55 *Nicotine Tob Res* 2013;15:1690-5.  
56  
57  
58  
59  
60

- 1  
2  
3  
4  
5  
6  
7  
8  
9  
10  
11  
12  
13  
14  
15  
16  
17  
18  
19  
20  
21  
22  
23  
24  
25  
26  
27  
28  
29  
30  
31  
32  
33  
34  
35  
36  
37  
38  
39  
40  
41  
42  
43  
44  
45  
46  
47  
48  
49  
50  
51  
52  
53  
54  
55  
56  
57  
58  
59  
60
24. Wong J, Lam DP, Abrishami A, et al. Short-term preoperative smoking cessation and postoperative complications: a systematic review and meta-analysis. *Can J Anaesth* 2012;59:268-79.
25. Schroeder RA, Marroquin CE, Bute BP, et al. Predictive indices of morbidity and mortality after liver resection. *Ann Surg* 2006;243:373-9.
26. Taketomi A, Kitagawa D, Itoh S, et al. Trends in morbidity and mortality after hepatic resection for hepatocellular carcinoma: an institute's experience with 625 patients. *J Am Coll Surg* 2007;204:580-7.
27. Barton GR, Sach TH, Doherty M, et al. An assessment of the discriminative ability of the EQ-5Dindex, SF-6D, and EQ VAS, using sociodemographic factors and clinical conditions. *Eur J Health Econ* 2008;9:237-49.
28. Gianotti L, Beretta S, Luperto M, et al. Enhanced recovery strategies in colorectal surgery: is the compliance with the whole program required to achieve the target? *Int J Colorectal Dis* 2014;29:329-41.
29. Nicholson A, Lowe MC, Parker J, et al. Systematic review and meta-analysis of enhanced recovery programmes in surgical patients. *Br J Surg* 2014;101:172-88.
30. Neville A, Lee L, Antonescu I, et al. Systematic review of outcomes used to evaluate enhanced recovery after surgery. *Br J Surg* 2014;101:159-71.

1  
2  
3  
4  
5  
6  
7  
8  
9  
10  
11  
12  
13  
14  
15  
16  
17  
18  
19  
20  
21  
22  
23  
24  
25  
26  
27  
28  
29  
30  
31  
32  
33  
34  
35  
36  
37  
38  
39  
40  
41  
42  
43  
44  
45  
46  
47  
48  
49  
50  
51  
52  
53  
54  
55  
56  
57  
58  
59  
60

Figure 1. The incidence of postoperative morbidities on the third day after surgery by enhanced recovery protocol groups. To control for type I error at 0.05 from multiple comparisons,  $P < 0.0063$  was considered significant

For peer review only



1  
2  
3  
4  
5  
6  
7  
8  
9  
10  
11  
12  
13  
14  
15  
16  
17  
18  
19  
20  
21  
22  
23  
24  
25  
26  
27  
28  
29  
30  
31  
32  
33  
34  
35  
36  
37  
38  
39  
40  
41  
42  
43  
44  
45  
46  
47  
48  
49  
50  
51  
52  
53  
54  
55  
56  
57  
58  
59  
60

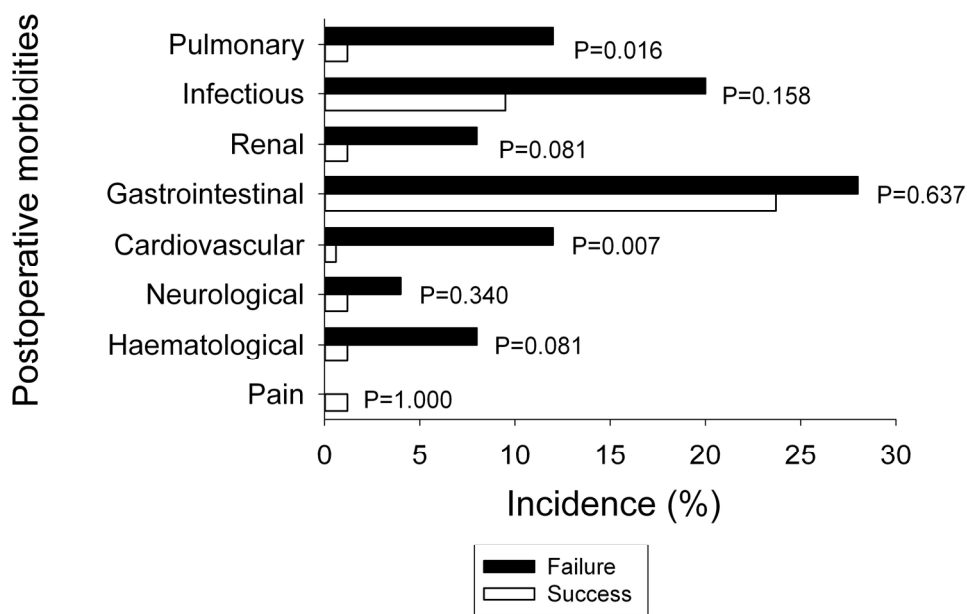

The incidence of postoperative morbidities on the third day after surgery by enhanced recovery protocol groups. To control for type I error at 0.05 from multiple comparisons,  $P < 0.0063$  was considered significant.

86x56mm (600 x 600 DPI)

view only

STROBE Statement—Checklist of items that should be included in reports of *cohort studies*

|                           | Item No | Recommendation                                                                                                                                                                                    | Page                      |
|---------------------------|---------|---------------------------------------------------------------------------------------------------------------------------------------------------------------------------------------------------|---------------------------|
| <b>Title and abstract</b> | 1       | (a) Indicate the study's design with a commonly used term in the title or the abstract                                                                                                            | 1                         |
|                           |         | (b) Provide in the abstract an informative and balanced summary of what was done and what was found                                                                                               | 2                         |
| <b>Introduction</b>       |         |                                                                                                                                                                                                   |                           |
| Background/rationale      | 2       | Explain the scientific background and rationale for the investigation being reported                                                                                                              | 4-5                       |
| Objectives                | 3       | State specific objectives, including any prespecified hypotheses                                                                                                                                  | 5                         |
| <b>Methods</b>            |         |                                                                                                                                                                                                   |                           |
| Study design              | 4       | Present key elements of study design early in the paper                                                                                                                                           | 5                         |
| Setting                   | 5       | Describe the setting, locations, and relevant dates, including periods of recruitment, exposure, follow-up, and data collection                                                                   | 5-7                       |
| Participants              | 6       | (a) Give the eligibility criteria, and the sources and methods of selection of participants. Describe methods of follow-up                                                                        | 5                         |
|                           |         | (b) For matched studies, give matching criteria and number of exposed and unexposed                                                                                                               | NA                        |
| Variables                 | 7       | Clearly define all outcomes, exposures, predictors, potential confounders, and effect modifiers. Give diagnostic criteria, if applicable                                                          | 7-8                       |
| Data sources/measurement  | 8*      | For each variable of interest, give sources of data and details of methods of assessment (measurement). Describe comparability of assessment methods if there is more than one group              | 7                         |
| Bias                      | 9       | Describe any efforts to address potential sources of bias                                                                                                                                         | 8                         |
| Study size                | 10      | Explain how the study size was arrived at                                                                                                                                                         | 9                         |
| Quantitative variables    | 11      | Explain how quantitative variables were handled in the analyses. If applicable, describe which groupings were chosen and why                                                                      | 8, Tables 1 & 2 footnotes |
| Statistical methods       | 12      | (a) Describe all statistical methods, including those used to control for confounding                                                                                                             | 8                         |
|                           |         | (b) Describe any methods used to examine subgroups and interactions                                                                                                                               | NA                        |
|                           |         | (c) Explain how missing data were addressed                                                                                                                                                       | No missing data           |
|                           |         | (d) If applicable, explain how loss to follow-up was addressed                                                                                                                                    | NA                        |
|                           |         | (e) Describe any sensitivity analyses                                                                                                                                                             | Not done                  |
| <b>Results</b>            |         |                                                                                                                                                                                                   |                           |
| Participants              | 13*     | (a) Report numbers of individuals at each stage of study—eg numbers potentially eligible, examined for eligibility, confirmed eligible, included in the study, completing follow-up, and analysed | 9                         |
|                           |         | (b) Give reasons for non-participation at each stage                                                                                                                                              | 9                         |
|                           |         | (c) Consider use of a flow diagram                                                                                                                                                                | Text adequate             |
| Descriptive data          | 14*     | (a) Give characteristics of study participants (eg demographic, clinical, social) and information on exposures and potential confounders                                                          | Table 1                   |
|                           |         | (b) Indicate number of participants with missing data for each variable of interest                                                                                                               | No missing data           |

|                          |     |                                                                                                                                                                                                              |                  |
|--------------------------|-----|--------------------------------------------------------------------------------------------------------------------------------------------------------------------------------------------------------------|------------------|
|                          |     | (c) Summarise follow-up time (eg, average and total amount)                                                                                                                                                  | 9,10             |
| Outcome data             | 15* | Report numbers of outcome events or summary measures over time                                                                                                                                               | 9                |
| Main results             | 16  | (a) Give unadjusted estimates and, if applicable, confounder-adjusted estimates and their precision (eg, 95% confidence interval). Make clear which confounders were adjusted for and why they were included | Table 2, 12-13   |
|                          |     | (b) Report category boundaries when continuous variables were categorized                                                                                                                                    | Tables footnotes |
|                          |     | (c) If relevant, consider translating estimates of relative risk into absolute risk for a meaningful time period                                                                                             | NA               |
| Other analyses           | 17  | Report other analyses done—eg analyses of subgroups and interactions, and sensitivity analyses                                                                                                               | 11-13            |
| <b>Discussion</b>        |     |                                                                                                                                                                                                              |                  |
| Key results              | 18  | Summarise key results with reference to study objectives                                                                                                                                                     | 13-14,17         |
| Limitations              | 19  | Discuss limitations of the study, taking into account sources of potential bias or imprecision. Discuss both direction and magnitude of any potential bias                                                   | 17               |
| Interpretation           | 20  | Give a cautious overall interpretation of results considering objectives, limitations, multiplicity of analyses, results from similar studies, and other relevant evidence                                   | 14-17            |
| Generalisability         | 21  | Discuss the generalisability (external validity) of the study results                                                                                                                                        | 17               |
| <b>Other information</b> |     |                                                                                                                                                                                                              |                  |
| Funding                  | 22  | Give the source of funding and the role of the funders for the present study and, if applicable, for the original study on which the present article is based                                                | 18               |

\*Give information separately for exposed and unexposed groups.

**Note:** An Explanation and Elaboration article discusses each checklist item and gives methodological background and published examples of transparent reporting. The STROBE checklist is best used in conjunction with this article (freely available on the Web sites of PLoS Medicine at <http://www.plosmedicine.org/>, Annals of Internal Medicine at <http://www.annals.org/>, and Epidemiology at <http://www.epidem.com/>). Information on the STROBE Initiative is available at <http://www.strobe-statement.org>.

# BMJ Open

## Factors associated with failure of enhanced recovery protocol in patients undergoing major hepatobiliary and pancreatic surgery: a retrospective cohort study

|                                 |                                                                                                                                                                                                                                                                                                                                                                                                                                                                                                                                                                                                                                                                                        |
|---------------------------------|----------------------------------------------------------------------------------------------------------------------------------------------------------------------------------------------------------------------------------------------------------------------------------------------------------------------------------------------------------------------------------------------------------------------------------------------------------------------------------------------------------------------------------------------------------------------------------------------------------------------------------------------------------------------------------------|
| Journal:                        | <i>BMJ Open</i>                                                                                                                                                                                                                                                                                                                                                                                                                                                                                                                                                                                                                                                                        |
| Manuscript ID:                  | bmjopen-2014-005330.R1                                                                                                                                                                                                                                                                                                                                                                                                                                                                                                                                                                                                                                                                 |
| Article Type:                   | Research                                                                                                                                                                                                                                                                                                                                                                                                                                                                                                                                                                                                                                                                               |
| Date Submitted by the Author:   | 04-Jun-2014                                                                                                                                                                                                                                                                                                                                                                                                                                                                                                                                                                                                                                                                            |
| Complete List of Authors:       | Lee, Anna; The Chinese University of Hong Kong, Anaesthesia and Intensive Care<br>Chiu, Chun Hung; The Chinese University of Hong Kong, Anaesthesia and Intensive Care<br>Cho, Mui Wai Amy; The Chinese University of Hong Kong, Anaesthesia and Intensive Care<br>Gomersall, Charles; The Chinese University of Hong Kong, Anaesthesia and Intensive Care<br>Lee, Kit Fai; The Chinese University of Hong Kong, Division of Hepatobiliary and Pancreatic Surgery<br>Cheung, Yue Sun; The Chinese University of Hong Kong, Division of Hepatobiliary and Pancreatic Surgery<br>Lai, Paul Bo San; The Chinese University of Hong Kong, Division of Hepatobiliary and Pancreatic Surgery |
| <b>Primary Subject Heading</b>: | Gastroenterology and hepatology                                                                                                                                                                                                                                                                                                                                                                                                                                                                                                                                                                                                                                                        |
| Secondary Subject Heading:      | Health services research, Surgery                                                                                                                                                                                                                                                                                                                                                                                                                                                                                                                                                                                                                                                      |
| Keywords:                       | Hepatobiliary surgery < SURGERY, Risk management < HEALTH SERVICES ADMINISTRATION & MANAGEMENT, Protocols & guidelines < HEALTH SERVICES ADMINISTRATION & MANAGEMENT                                                                                                                                                                                                                                                                                                                                                                                                                                                                                                                   |

SCHOLARONE™  
Manuscripts

1  
2  
3 **Factors associated with failure of enhanced recovery protocol in patients**  
4 **undergoing major hepatobiliary and pancreatic surgery: a retrospective cohort**  
5 **study**  
6  
7  
8  
9

10  
11 Anna LEE<sup>1</sup> , Chun Hung CHIU<sup>1</sup> , Mui Wai Amy CHO<sup>1</sup> , Charles David

12  
13 GOMERSALL<sup>1</sup> , Kit Fai LEE<sup>2</sup> , Yue Sun CHEUNG<sup>2</sup> , Paul Bo San LAI<sup>2</sup>  
14  
15  
16

17  
18 <sup>1</sup> Department of Anaesthesia and Intensive Care, Prince of Wales Hospital, The  
19 Chinese University of Hong Kong  
20  
21

22  
23 <sup>2</sup> Division of Hepatobiliary and Pancreatic Surgery, Department of Surgery, Prince of  
24 Wales Hospital, The Chinese University of Hong Kong  
25  
26  
27

28  
29 **Address for correspondence:** Anna Lee, Department of Anaesthesia and  
30 Intensive Care, Prince of Wales Hospital, The Chinese University of Hong Kong,  
31 Shatin, New Territories, Hong Kong  
32  
33

34  
35 Phone: +852 2632 2735 Fax: +852 2637 2422 Email: [annalee@cuhk.edu.hk](mailto:annalee@cuhk.edu.hk)  
36  
37

38  
39 **Reprints:** Reprints will not be available from the authors  
40

41  
42 **Category:** Research article  
43

44  
45 **Meeting:** Presented in part at the combined Royal Australasian College of Surgeons  
46 Annual Scientific Congress and the Australian and New Zealand College of  
47 Anaesthetists and Faculty of Pain Medicine Annual Scientific Meeting, in Singapore,  
48 5<sup>th</sup>-9<sup>th</sup> May 2014.  
49  
50

51  
52 **MESH terms:** Enhanced recovery after surgery; Postoperative care; Liver surgery;  
53 Pancreatic surgery; Cohort  
54  
55

56  
57 **Word count:** 251 (Abstract); 4083 (Main text, including tables and figures)  
58  
59  
60

## ABSTRACT

**Objective:** This study examined the risk factors associated with failure of enhanced recovery protocol after major hepatobiliary and pancreatic (HBP) surgery.

**Setting and participants:** A retrospective cohort of 194 adults patients undergoing major HBP surgery at a university hospital in Hong Kong was followed up for 30 days. The patients were from a larger cohort study of 736 consecutive adults with preoperative urinary cotinine concentration to examine the association between passive smoking and risk of perioperative respiratory complications and postoperative morbidities.

**Outcome measures:** The primary outcome was failure of enhanced recovery protocol. This was defined as a composite measure of the following events: intensive care unit (ICU) stay more than 24 hours after surgery, unplanned admission to ICU within 30 days after surgery, hospital readmission, reoperation and mortality.

**Results:** There were 25 failures of enhanced recovery after HBP surgery (12.9%, 95% CI, 8.5% to 18.4%). After adjusting for elective ICU admission, smokers (RR 2.21, 95% CI, 1.10 to 4.46), high preoperative alanine transaminase/glutamic-pyruvic transaminase (RR 3.55, 1.68 to 7.49) and postoperative morbidities (RR 2.69, 95% CI, 1.30 to 5.56) were associated with failures of enhanced recovery in the generalized estimating equation risk model. Compared to those managed successfully, failures stayed longer in ICU (median 19 vs. 25 hours,  $P<0.001$ ) and in hospital for postoperative care (median 7 vs. 13 days,  $P=0.003$ ).

**Conclusion:** Smokers and patients having high preoperative alanine transaminase/glutamic-pyruvic transaminase concentration or have a high risk of postoperative morbidities are likely to fail enhanced recovery protocol in HBP surgery programs.

### Strengths and limitations of this study

- This is the first study to identify risk factors associated with the failure of enhanced recovery protocol in major hepatobiliary and pancreatic surgery.
- Instead of using length of hospital stay as an endpoint, failure was defined as a composite measure of slow recovery: length of stay in the intensive care unit (ICU) more than 24 hours after surgery, unplanned admission to ICU within 30 days, readmission to the hospital within 30 days after surgery, reoperation for complications and 30-day mortality
- Smokers (defined by self-reported history and adjusted urinary cotinine concentration) and patients having high preoperative alanine transaminase glutamic-pyruvic transaminase concentration or have a high risk of postoperative morbidities are likely to fail clinical pathways in fast-track hepatobiliary and pancreatic surgery. Similar results were found in a sensitivity analysis using adjusted urinary cotinine concentrations.
- We did not consider the compliance rate of individual components of the early recovery after hepatobiliary pancreatic surgery program
- High risk patients at risk of failing enhanced recovery protocols in major hepatobiliary pancreatic surgery may benefit from additional care to minimize perioperative morbidities and length of stay.

## INTRODUCTION

Enhanced recovery after major hepatobiliary and pancreatic surgery (ERAHBPS) is a complex intervention that includes many of the following components: patient and family education, no bowel preparation, no preanaesthetic medication, preoperative carbohydrate loading, thromboembolic prophylaxis, antiemetic prophylaxis, epidural analgesia, intraoperative normothermia, prophylactic antibiotics, no systemic opioids, fluid restriction, no surgical drains, no standard postoperative nasogastric tubes, postoperative nutritional care and early mobilization.<sup>1</sup>

Recent systematic reviews<sup>1,2</sup> of several observational studies of ERAHBPS programs suggest that it is safe and feasible. Compared to traditional clinical pathways, fast-track hepatobiliary and pancreatic (HBP) surgery programs have similar risks of readmission, morbidity and mortality<sup>1-3</sup> and reduced the duration of postoperative length of stay and overall hospital cost.<sup>3</sup> However, compliance with core components of enhance recovery after liver surgery program vary between high-volume European centers, with a median adoption of 9 (range 7 to 12) of 22 core elements.<sup>4</sup>

As with all enhanced recovery after surgery (ERAS) programs, a small proportion of patients will fail fast-track HBP surgery and require additional intensive care unit (ICU) resources. Although not all fast-track HBP surgical patients are routinely admitted to ICU after their procedure,<sup>5,6</sup> ICU care after liver resection was associated with a decreased risk in hospital mortality (odds ratio 0.26, 95% CI 0.10 to 0.71) and a reduction in total hospital costs (13%).<sup>7</sup> These results suggest that careful selection



1  
2  
3 of patients for ERAHBPS is crucial for maximizing the efficiency of perioperative care  
4  
5 pathways.  
6  
7

8  
9  
10 Fast-track failure risk models after cardiac surgery have been developed<sup>8</sup> and  
11  
12 externally validated<sup>9</sup> to facilitate the planning of perioperative care pathways, but  
13  
14 factors associated with failure of enhanced recovery protocol after HBP surgery are  
15  
16 unknown. The objectives of this study were to estimate the incidence of and identify  
17  
18 the risk factors associated with failure of enhanced recovery protocol after HBP  
19  
20 surgery. And with such information, we can identify a subgroup of patients at risk of  
21  
22 failure to provide additional care to minimize perioperative morbidities and length of  
23  
24 stay.  
25  
26  
27

## 28 29 **METHODS**

### 30 31 **Study cohort**

32  
33 The Joint Chinese University of Hong Kong-New Territories East Cluster Clinical  
34  
35 Research Ethics Committee approved this retrospective cohort study of patients  
36  
37 undergoing major HBP surgery at the Prince of Wales Hospital in Hong Kong  
38  
39 between January 2011 and November 2012 (CRE-2013.181). The patients were  
40  
41 from a larger cohort study of 736 consecutive adult patients with preoperative urinary  
42  
43 cotinine concentration to examine the association between passive smoking and risk  
44  
45 of perioperative respiratory complications and postoperative morbidities.<sup>10</sup> All  
46  
47 patients gave written informed consent before surgery. Patients undergoing other  
48  
49 types of surgery, unable to give written informed consent, having chronic renal failure,  
50  
51 younger than 18 years and urine cotinine samples collected more than 48 h before  
52  
53 surgery were excluded.  
54  
55  
56  
57  
58  
59  
60

1  
2  
3  
4  
5 The types of surgery included were laparoscopic liver resection (nonanatomical  
6 wedge resections, or resection of 1 or 2 segments), minor open liver resection (fewer  
7 than 3 segments including multiple non-anatomical resections), major open liver  
8 resections (3 or more segments), liver resection with biliary reconstruction<sup>11;12</sup> and  
9 pancreatic surgery. Pancreatic surgery included Whipple's procedure, double bypass  
10 (hepaticojejunostomy and gastrojejunostomy in unresectable cancer of the head of  
11 pancreas) and distal pancreatectomy.  
12  
13  
14  
15  
16  
17  
18  
19  
20

### 21 22 23 **Typical management**

24  
25 The typical clinical care pathway for HBP surgical patients involved the following:  
26 admission to surgical ward one day before surgery, patient education, no  
27 preanaesthetic medication, mechanical prophylaxis for deep vein thrombosis,  
28 intraoperative prophylactic antibiotics, normothermia during surgery, ICU or surgical  
29 ward for first 24 h after surgery, surgical ward, early mobilization and hospital  
30 discharge (Table 1). The use of epidural anaesthesia/analgesia is not routine  
31 because of concerns about postoperative coagulopathy in patients with cirrhosis of  
32 liver.<sup>13</sup> Patients were given patient controlled morphine analgesia.  
33  
34  
35  
36  
37  
38  
39  
40  
41  
42  
43  
44

45 Although there was no formalized extubation protocol, extubation at the end of liver  
46 resection surgery or within 1 h after admission to ICU was expected; for pancreatic  
47 surgery where most patients went to ICU, extubation within 4 h was expected. There  
48 is no surgical high dependency unit at the Prince of Wales Hospital, Hong Kong.  
49  
50  
51  
52  
53  
54  
55  
56  
57  
58  
59  
60

Drains were removed as soon as possible when there was no biliary or pancreatic anastomotic leakage. In patients undergoing liver surgery, gradual resumption of diet from liquid to solid food was expected during the first three days after surgery. For Whipple's operation, the diet resumption was slower, starting from the fifth postoperative day and a normal diet was expected by the seventh. For patients who could not tolerate oral intake by the seventh day after surgery, parenteral nutrition was given with a target of 25-30kcal/kg.

Table 1. Enhanced recovery elements in liver and pancreatic resectional surgery

|                 | <b>Liver resection</b>                                                                                                                                                         | <b>Pancreatic resection</b>                                                                                                                                                                       |
|-----------------|--------------------------------------------------------------------------------------------------------------------------------------------------------------------------------|---------------------------------------------------------------------------------------------------------------------------------------------------------------------------------------------------|
| Pre-operatively | Information given to patient and patient education<br>No premedication                                                                                                         | Information given to patient and patient education<br>No premedication                                                                                                                            |
| Day 0           | Normothermia during surgery<br>Mechanical prophylaxis for deep vein thrombosis<br>Intraoperative prophylactic antibiotics<br>No nasogastric tube<br>No routine abdominal drain | Normothermia during surgery<br>Mechanical prophylaxis for deep vein thrombosis<br>Intraoperative prophylactic antibiotics<br>Routine nasogastric and abdominal drain only for Whipple's operation |
| Day 1           | Patient controlled morphine analgesia<br>Oral fluid<br>Moving patient to chair                                                                                                 | Patient controlled morphine analgesia<br>Oral fluid<br>Moving patient to chair                                                                                                                    |
| Day 2           | Fluid diet<br>Enhanced mobilization<br>Removal of urinary catheter                                                                                                             | Enhanced mobilization                                                                                                                                                                             |
| Day 3           | Soft diet<br>Removal of drain                                                                                                                                                  | Removal of urinary catheter<br>Removal of nasogastric tube if draining <300ml                                                                                                                     |
| Day 4           | Normal diet                                                                                                                                                                    | Fluid diet<br>Removal of drain                                                                                                                                                                    |
| Day 5           | Discharge if no fever, pain can be controlled with oral analgesics and patient has adequate mobilization                                                                       | Soft diet                                                                                                                                                                                         |
| Day 6           |                                                                                                                                                                                | Normal diet                                                                                                                                                                                       |
| Day 7           |                                                                                                                                                                                | Discharge if no fever, pain can be controlled with oral analgesics and patient has adequate mobilization                                                                                          |

## Outcome Measure

For the purposes of this study, we define failure of enhanced recovery protocol after HBP surgery as a composite measure of the following events: length of ICU stay more than 24 h after surgery, unplanned admission to ICU within 30 days after surgery, readmission to the hospital within 30 days after surgery, reoperation for complications and 30-day mortality. These events were chosen as markers of slow recovery and are common quality of care indicators. Unlike previous ERAS studies, we did not chose length of stay as a primary outcome as it has been shown that reductions in length of stay up to a median of 2 days may be related to changes in organization of care and not to the effect of the ERAS program.<sup>14</sup>

We collected patient demographics, smoking status, preoperative urinary cotinine concentration that was adjusted for creatinine level, American Society of Anesthesiologists' Physical Status, Surgical Apgar score,<sup>15</sup> duration of surgery, ICU admission details, APACHE II (severity of illness score in patients admitted to ICU),<sup>16</sup> preoperative liver function tests, indocyanine green test and coagulation tests, and failure events from the hospital electronic Clinical Management System database. The research staff collected postoperative morbidities (pulmonary, infectious, renal, gastrointestinal, cardiovascular, neurological, haematological, wound and severe pain) on the third day after surgery using a reliable and valid Postoperative Morbidity Survey questionnaire.<sup>17</sup> The EQ-5D index, a health-related quality of life using a US set of reference weights, was measured on the third day after surgery<sup>18</sup> as the greatest difference in EQ-5D index between ERAHBPS and standard care occur between postoperative day 2 and 5.<sup>19</sup> Current smoking was defined as no smoking cessation within 2 months before surgery or the patient had an adjusted urinary

1  
2  
3 cotinine concentration  $\geq 550$  ng/mL within 48 hours before surgery.<sup>10</sup> The research  
4  
5 staff was blinded to the urinary cotinine concentration results.  
6  
7

### 8 9 10 **Statistical Analysis**

11  
12 Continuous data were expressed as mean and standard deviation (SD) or median  
13  
14 and interquartile range (IQR). The 95% confidence interval (95% CI) was estimated  
15  
16 around the incidence of HBP surgery failure. Appropriate Student t-tests, Mann-  
17  
18 Whitney U tests,  $\chi^2$  analyses or exact tests were used to compare factors associated  
19  
20 with failure of enhanced recovery protocol. To adjust for multiple testing of individual  
21  
22 postoperative morbidity events, a Bonferroni correction was used so that the  
23  
24 significance criterion was set at  $P < 0.0063$ . There was no missing data.  
25  
26  
27

28  
29  
30 A generalized estimating equation (GEE) model with a Poisson distribution, log-link  
31  
32 function and exchangeable correlation<sup>20</sup> was used to obtain a common-effect relative  
33  
34 risk (RR) of failure of enhanced recovery protocol after HBP surgery. This GEE  
35  
36 model was more appropriate for analysis of composite measures and assumes that  
37  
38 there is a single common exposure effect across all components used in the failure  
39  
40 composite endpoint. We included elective ICU admission in the model as we  
41  
42 considered this factor to be clinically important with regards to postoperative bed  
43  
44 utilization. The calibration and discrimination of the model was assessed using the  
45  
46 Hosmer-Lemeshow goodness-of-fit test and estimating the area under the receiver  
47  
48 characteristic operating curve (AUROC). Internal validation of the model was  
49  
50 performed by bootstrapping 1000 samples and estimating the AUROC and 95% CI.  
51  
52  
53 A sensitivity analysis of the GEE model was performed by including adjusted urinary  
54  
55 cotinine concentration as a continuous variable instead of smoking status as a  
56  
57  
58  
59  
60

1  
2  
3 categorical independent variable. Statistical analyses were performed using STATA  
4  
5 (version 13.1) software (STATA Corp, College Station, TX).  
6  
7

8  
9  
10 Using PASS (version 11) software (NCSS, Kaysville, UT), a sample size of 190 (19  
11  
12 failure and 171 success) patients will achieve 80% power to detect a difference of  
13  
14 0.20 between the AUROC under the null hypothesis of 0.70 (fair discrimination) and  
15  
16 an AUROC under the alternative hypothesis of 0.50 (no discrimination) using a 2-  
17  
18 sided z-test at a significance level of 0.05.  
19

## 20 21 22 **RESULTS**

23  
24 Of the 217 consecutive patients undergoing HBP surgery, 23 were not eligible (10  
25  
26 not available in the ward at time of recruitment, 5 refusals, 4 already participated in  
27  
28 the study, 3 unable to consent and 1 had renal impairment). There were 25 failures  
29  
30 of enhanced recovery (12.9%, 95% CI, 8.5% to 18.4%) in 194 patients undergoing  
31  
32 major HBP surgery. Of the 94 elective ICU patients, 10 (10.6%) stayed in ICU for  
33  
34 more than 24 hours after surgery. One patient was admitted to ICU unexpectedly  
35  
36 due to surgical emphysema and stayed in ICU for 43 hours after surgery. There were  
37  
38 2 (2.1%) readmissions to ICU within 24 hours (1 for acute renal failure/atrial  
39  
40 fibrillation and 1 for atelectasis), 2 reoperations (1.0%) and 11 hospital readmissions  
41  
42 (5.6%). The reasons for hospital readmissions were abdominal complications (n=5),  
43  
44 wound complications (n=3), pyrexia with or without chills (n=2) and jaundice (n=1).  
45  
46  
47  
48 No patient died within 30 days after surgery.  
49  
50

51  
52  
53  
54 The median postoperative length of hospital stay was longer in the failure group (13  
55  
56 days, 7 to 18) than in the successful group (7 days, 6 to 9) (P=0.003). This was  
57  
58  
59  
60

mainly due to longer median length of postoperative hospital stay in patients undergoing hepatic surgery failing enhanced recovery management (12 days, 7 to 17) compared to those successfully managed (7 days, 6 to 9) ( $P=0.001$ ). There were 26 patients undergoing pancreatic surgery. The median duration of postoperative hospital stay in patients undergoing pancreatic surgery failing and succeeding enhanced recovery management were 16 (5 to 35) and 10 (8 to 18) days, respectively ( $P=0.716$ ). The median time from initial hospital discharge to readmission was 6 days (2 to 13).

The demographic and preoperative characteristics associated with failure of enhanced recovery protocol are shown in Table 2. Of the 137 patients with preoperative indocyanine green test results, 14 (7.2%) were classified as borderline and 4 (2.1%) were poor. There was no significant association between indocyanine green test results and failure groups ( $P=0.735$ ).

Table 2. Demographic and preoperative factors associated with failure of enhanced recovery protocol after major hepatobiliary and pancreatic surgery

|                                                               | Enhanced Recovery Protocol Groups |                       | P value |
|---------------------------------------------------------------|-----------------------------------|-----------------------|---------|
|                                                               | Failure (n=25)                    | Success (n=169)       |         |
| Mean age (SD), y                                              | 57 (11)                           | 59 (11)               | 0.498   |
| Males, n (%)                                                  | 19 (76)                           | 131 (78)              | 0.866   |
| American Society of Anesthesiologists' Physical Status, n (%) |                                   |                       |         |
| I                                                             | 2 (8)                             | 25 (15)               | 0.512   |
| II                                                            | 18 (72)                           | 121 (72)              |         |
| III/IV                                                        | 5 (20)                            | 23 (14)               |         |
| Current smoker, n (%)                                         | 9 (36)                            | 35 (21)               | 0.088   |
| Median adjusted cotinine, ng/mL (IQR)                         | 1.34<br>(0.60 – 265.82)           | 1.07<br>(0.55 – 3.51) | 0.183   |
| Type of Surgery, n (%)                                        |                                   |                       |         |
| Exploratory                                                   | 1 (4)                             | 5 (3)                 | 0.441   |
| Laparoscopic liver resection                                  | 3 (12)                            | 28 (17)               |         |
| Minor open liver resection                                    | 5 (20)                            | 62 (37)               |         |
| Major open liver ± biliary reconstruction                     | 12 (48)                           | 52 (31)               |         |
| Whipple                                                       | 2 (8)                             | 15 (9)                |         |
| Other pancreatic surgery                                      | 2 (8)                             | 7 (4)                 |         |
| Magnitude of Surgery, n (%)                                   |                                   |                       |         |

|                                                 |         |          |       |
|-------------------------------------------------|---------|----------|-------|
| Major                                           | 4 (16)  | 36 (21)  | 0.541 |
| Ultramajor                                      | 21 (84) | 133 (79) |       |
| Low albumin (<35 g/L), n (%)                    | 2 (4)   | 12 (7)   | 0.698 |
| High bilirubin ( $\mu\text{mol/L}$ )*, n(%)     | 7 (28)  | 27 (16)  | 0.159 |
| Alkaline Phosphatase (IU/L), n (%)              |         |          |       |
| Normal <sup>†</sup>                             | 14 (56) | 123 (73) |       |
| Low                                             | 1 (4)   | 3 (2)    | 0.214 |
| High                                            | 10 (40) | 43 (25)  |       |
| High ALT/GPT(IU/L) <sup>‡</sup> , n (%)         | 11 (44) | 23 (14)  | 0.001 |
| Haemoglobin (g/dL), n (%)                       |         |          |       |
| Normal <sup>§</sup>                             | 14 (56) | 121 (72) |       |
| Low                                             | 10 (40) | 46 (27)  | 0.211 |
| High                                            | 1 (4)   | 2 (1)    |       |
| Platelets, n (%)                                |         |          |       |
| Normal (150-384 x 10 <sup>9</sup> /L)           | 14 (56) | 117 (69) |       |
| Low                                             | 10 (40) | 50 (30)  | 0.294 |
| High                                            | 1 (4)   | 2 (1)    |       |
| Prothrombin time, n (%)                         |         |          |       |
| Normal (9.5-12 s)                               | 19 (76) | 144 (85) |       |
| Low                                             | 0 (0)   | 1 (1)    | 0.423 |
| High                                            | 6 (24)  | 24 (14)  |       |
| Activated partial thromboplastin time, n (%)    |         |          |       |
| Normal (28.2-37.4 s)                            | 22 (88) | 153 (91) |       |
| Low                                             | 2 (8)   | 10 (6)   | 0.914 |
| High                                            | 1 (4)   | 6 (4)    |       |
| High International Normalised Ratio, n (%)      | 0 (0)   | 2 (1)    | 1.000 |
| Urinary Creatinine ( $\mu\text{mol/L}$ ), n (%) |         |          |       |
| Normal <sup>†</sup>                             | 20 (80) | 143 (85) |       |
| Low                                             | 3 (12)  | 17 (10)  | 0.815 |
| High                                            | 2 (8)   | 9 (5)    |       |

\*High bilirubin defined as more than 19 $\mu\text{mol/L}$  in males, and more than 17 $\mu\text{mol/L}$  in females

<sup>†</sup>Age and gender specific range

<sup>‡</sup>High Alanine transaminase/glutamic-pyruvic transaminase defined as more than 67 IU/L in males and more than 55 IU/L in females

<sup>§</sup>Normal range is 13.2 to 17.2g/dL for males and 11.9 to 15.1g/dL for females

The median duration of hepatic surgery was similar between failure (270 min, 186 to 336) and successful enhanced recovery groups (236 min, 180 to 315) (P=0.348).

There was no difference in the median duration of pancreatic surgery between failure (395 min, 192 to 641) and successful enhanced recovery groups (488 min, 291 to 560) (P=0.933). The median Surgical Apgar Score was similar between failure (8, 6 to 9) and successful (8, 7 to 9) enhanced recovery groups (P=0.912).

Elective ICU admissions occurred in 13 (41.9%) patients undergoing laparoscopic liver resection, 19 (23.9%) minor open liver resection, 45 (70.3%) major open liver



1  
2  
3 and/or biliary reconstruction, 15 (88.2%) Whipple and 2 (22.2%) other pancreatic  
4  
5 surgery. Of the 94 elective ICU admissions, 17 (18.1%) patients failed enhanced  
6  
7 recovery protocols after HBP surgery. Patients with elective ICU admissions were  
8  
9 more likely to be enhanced recovery failures than patients sent to the ward after  
10  
11 surgery ( $RR_{unadjusted}$  1.49, 95% CI, 1.09 to 2.05). The median duration of ICU length  
12  
13 of stay was longer in the failure group (25 hours, 20 to 39) than in the successful  
14  
15 enhanced recovery group (19 hours, 17 to 22) ( $P < 0.001$ ). However, the mean  
16  
17 APACHE II score was similar between failure ( $13.6 \pm 3.8$ ) and successful ( $12.3 \pm 3.5$ )  
18  
19 enhanced recovery groups ( $P = 0.150$ ).  
20  
21  
22  
23  
24

25 The overall incidence of postoperative morbidities was 35.1% (95% CI, 28.4% to  
26  
27 42.2%). There was no reported wound dehiscence (requiring surgical exploration or  
28  
29 drainage of pus from the operation wound with or without isolation of organisms)<sup>17</sup> on  
30  
31 the third postoperative day. There was no difference in the incidence of  
32  
33 postoperative morbidities between groups according to the *a priori* Bonferroni-  
34  
35 correction P value criterion (Figure 1). Patients with a postoperative morbidity were  
36  
37 twice as likely to be a failure ( $RR_{unadjusted}$  2.36, 95% CI, 1.13 to 4.91) than those  
38  
39 without. There was no difference in the mean EQ-5D index between failure ( $0.53 \pm$   
40  
41  $0.30$ ) and successful enhanced recovery groups ( $0.63 \pm 0.29$ ) ( $P = 0.166$ ).  
42  
43  
44  
45  
46  
47  
48  
49

50 After adjusting for planned postoperative ICU care, current smoking, high  
51  
52 preoperative alanine transaminase/glutamic-pyruvic transaminase concentration and  
53  
54 postoperative morbidities on the third day after surgery were significant risk factors  
55  
56 associated with failure of enhanced recovery protocol (Table 3). The GEE model had  
57  
58  
59  
60

adequate calibration (Hosmer-Lemeshow goodness-of-fit  $\chi^2$  8df, P=0.352) and excellent discrimination (AUROC = 0.87, 95% CI, 0.83 to 0.92).

Table 3. Risk factors for failure in enhanced recovery protocol after major hepatobiliary and pancreatic surgery using the generalized estimating equation model

|                             | Common-effect RR (95% CI) | P value |
|-----------------------------|---------------------------|---------|
| ICU admission               |                           |         |
| None                        | 1.00                      |         |
| Elective                    | 0.41 (0.14 – 1.20)        | 0.104   |
| Smoking status              |                           |         |
| Never-smoker/Exsmoker       | 1.00                      |         |
| Current smoker              | 2.21 (1.10 – 4.46)        | 0.027   |
| ALT/GPT(IU/L)*              |                           |         |
| Normal                      | 1.00                      |         |
| High                        | 3.55 (1.68 – 7.49)        | 0.001   |
| Any postoperative morbidity |                           |         |
| None                        | 1.00                      |         |
| Present on Day 3            | 2.69 (1.30 – 5.56)        | 0.007   |

\* High Alanine transaminase/glutamic-pyruvic transaminase defined as more than 67 IU/L in males and more than 55 IU/L in females

The results of a sensitivity analysis on the main GEE model using adjusted urinary cotinine concentration instead of smoking status are shown Table 4. Compared to patients with nil urinary cotinine concentration, the predicted adjusted risk for failure in enhanced recovery protocol in patients with urinary cotinine concentrations of 50, 500 and 1500 ng/ml were 1.04 (95% CI, 1.01 to 1.07), 1.52 (95% CI, 1.22 to 1.90) and 3.51 (95% CI, 1.80 to 6.83) respectively. The GEE model had adequate calibration (Hosmer-Lemeshow goodness-of-fit  $\chi^2$  8df, P=0.496) and excellent discrimination (AUROC = 0.87, 95% CI, 0.82 to 0.91).

Table 4. Sensitivity analysis on the risk factors for failure in enhanced recovery protocol after major hepatobiliary and pancreatic surgery

|                                          | Common-effect RR (95% CI) | P value |
|------------------------------------------|---------------------------|---------|
| ICU admission                            |                           |         |
| None                                     | 1.000                     |         |
| Elective                                 | 0.505 (0.176 – 1.444)     | 0.202   |
| Adjusted cotinine concentration (ng/ml)* | 1.001 (1.000 – 1.001)     | <0.001  |
| ALT/GPT(IU/L)†                           |                           |         |
| Normal                                   | 1.000                     |         |
| High                                     | 4.626 (2.097 – 10.207)    | <0.001  |
| Any postoperative morbidity              |                           |         |
| None                                     | 1.000                     |         |

|                  |                       |       |
|------------------|-----------------------|-------|
| Present on Day 3 | 2.657 (1.312 – 5.379) | 0.007 |
|------------------|-----------------------|-------|

Active smokers commonly defined as urinary cotinine concentration >50ng/ml<sup>21</sup>

<sup>†</sup>High Alanine transaminase/glutamic-pyruvic transaminase defined as more than 67 IU/L in males and more than 55 IU/L in females

## DISCUSSION

Our management of patients undergoing HBP surgery incorporated a small proportion of evidence-based components described in ERAS programs for hepatic<sup>4</sup> and pancreatic<sup>22</sup> surgery. For every eight patients undergoing major HBP surgery, one was at risk of failing enhanced recovery protocols in major HBP surgery. However, no patients died within 30 days after surgery. This may be due to the majority of our patients (86%) classified as American Society of Anesthesiologists' physical status grades I and II, benefits of planned bundles of care in the ERAS program or good access to postoperative ICU care. Prolonged stay in ICU (12%) and hospital readmissions (6%) were the most common failure events. Our hospital readmission rate and 30-day mortality are within the range described in studies included in recent systematic reviews of fast-track liver resection and pancreatic surgery.<sup>1;2;22;23</sup> Our patients who failed enhanced recovery protocols after major HBP surgery had clinically significantly longer ICU stays and postoperative stays in hospital.

Access to ICU admission after surgery affects outcomes.<sup>24</sup> Under half (48.5%) of our patients had elective ICU admission after surgery. Patients with elective ICU admissions after surgery were high-risk patients as suggested by the results of the univariate analysis where they were 1.5 times more likely to be failures than patients sent to the ward after surgery. However, when the elective ICU admission variable was included in the GEE models, the common-effect relative risk, although not significant, suggested a possible protective effect on failure. A previous study

1  
2  
3 showed that intensive care physician staffing was associated with better outcomes  
4 after hepatic resection from prompt diagnosis and treatment of nonsurgical  
5 complications.<sup>7</sup> Our incidence of ICU readmission (2.1%) within 24 h appears  
6  
7 acceptable. Previous studies included in systematic reviews of fast-track HBP  
8  
9 surgery<sup>1;2;22;23</sup> have not reported the rate of ICU readmissions.  
10  
11  
12  
13

14  
15  
16 There is a paucity of studies examining the effect of smoking on fast-track surgery.  
17  
18 Compared to conventional care programs, smoking was associated with 30-day  
19  
20 hospital readmissions (odds ratio 1.60, 95% CI, 1.05 to 2.44), but not with prolonged  
21  
22 length of hospital stay of more than 4 days (odds ratio 1.34, 95% CI, 0.92 to 1.95) in  
23  
24 patients undergoing fast-track hip and knee arthroplasty.<sup>25</sup> However, current smoking  
25  
26 was based on self-reported smoking history up to a month before hospital<sup>25</sup> and the  
27  
28 effect of smoking on enhanced recovery failure is likely to be underestimated as  
29  
30 many smokers (17%) deny smoking before elective surgery.<sup>26</sup> In contrast, we used  
31  
32 both self-reported smoking history and adjusted urinary cotinine concentration to  
33  
34 increase the accuracy of preoperative smoking status data. We have shown that  
35  
36 current smokers were up to four times more likely to be enhanced recovery failures  
37  
38 compared to never-smokers and former smokers in the GEE model. The results of  
39  
40 the sensitivity analysis using adjusted urinary cotinine concentration further  
41  
42 strengthens the association between smoking and the risk of enhanced recovery  
43  
44 failure. Thus, smoking cessation before HBP surgery would be expected to decrease  
45  
46 the risk of enhanced recovery failures substantially. Smoking cessation at least 4  
47  
48 weeks, and preferably 8 weeks, before surgery significantly reduced the risk of  
49  
50 postoperative respiratory and wound-healing complications.<sup>27</sup> Smoking is a  
51  
52  
53  
54  
55  
56  
57  
58  
59  
60

1  
2  
3 modifiable risk factor that surgeons and anaesthesiologists can work on when  
4  
5 patients are booked for surgery.  
6  
7

8  
9  
10 Of all the preoperative liver function and coagulation tests performed, high alanine  
11  
12 transaminase/glutamic-pyruvic transaminases (ALT/GPT) concentration was the only  
13  
14 independent biochemical risk factor associated with enhanced recovery failures. The  
15  
16 strong association is indicative of the high risk of operating on an acutely inflamed  
17  
18 liver.<sup>28</sup> A previous study<sup>29</sup> found that alanine aminotransferase  $\geq 70$  IU/L was an  
19  
20 independent risk factor (odd ratio 2.02, 95% CI, 1.33 to 3.07) for postoperative  
21  
22 complications after hepatic resection for hepatocellular carcinoma.  
23  
24

25  
26  
27 Fast-track open liver resection was associated with a reduction in general  
28  
29 complications as defined by the Postoperative Morbidity Survey<sup>17</sup> by 36% (95% CI  
30  
31 16% to 52%).<sup>19</sup> A direct comparison between our incidence of postoperative  
32  
33 morbidities on the third day after surgery and Jones et al.'s study<sup>19</sup> is difficult as the  
34  
35 timing of their postoperative morbidities was not specified. Our GEE model found  
36  
37 that patients with any postoperative morbidity on the third day after surgery were  
38  
39 three times more likely to be an enhanced recovery failure than patients without  
40  
41 reported postoperative morbidity. Specifically, after adjustment for multiple testing,  
42  
43 cardiovascular events (diagnostic tests or treatment in last 24 h for new myocardial  
44  
45 infarction or ischaemia, hypotension, arrhythmias, cardiogenic pulmonary oedema or  
46  
47 thrombotic events)<sup>17</sup> was weakly associated with the risk of failure. Early  
48  
49 postoperative morbidities are associated with longer duration of hospital stay<sup>30</sup> and  
50  
51 an increased risk of hospital readmission.<sup>31</sup>  
52  
53  
54  
55  
56  
57  
58  
59  
60

1  
2  
3 Using a minimal important difference of 0.03,<sup>32</sup> we found that patients in the  
4  
5 enhanced recovery failure group had lower health-related quality of life than in the  
6  
7 successful group. Our health-related quality of life on the third day after surgery in  
8  
9 the successful group was similar to those reported in the standard care group by  
10  
11 Jones et al.<sup>19</sup> Our practice does not include carbohydrate drink up to 2 hours before  
12  
13 surgery, pharmacological prophylaxis for deep vein thrombosis or the routine use of  
14  
15 epidural anaesthesia.  
16  
17

18  
19  
20  
21 Overall, the results of this study suggest that it is possible to identify a subgroup of  
22  
23 patients requiring additional care to minimize perioperative morbidity and length of  
24  
25 stay. Patients who are smokers, have high ALT/GPT concentration or are at a high  
26  
27 risk of postoperative morbidities are likely to fail enhanced recovery protocol in HBP  
28  
29 surgery. In defining who is at high risk of postoperative morbidities, the American  
30  
31 Society of Anesthesiologists' Physical Status grades III and IV and risk more than 50%  
32  
33 estimated in the POSSUM-defined postoperative morbidity model may be useful as  
34  
35 surrogate markers.<sup>17</sup> For those patients at high risk of HBP surgery failure, elective  
36  
37 postoperative ICU admission and measures targeted to avoid postoperative  
38  
39 cardiorespiratory complications are warranted to reduce the risk of failure of  
40  
41 enhanced recovery events.  
42  
43  
44  
45  
46

47  
48 There are several limitations of this study. First, we did not measure the compliance  
49  
50 rate of individual components of the ERAHBPS program. Recent studies suggest  
51  
52 that better patient care and outcome can be achieved regardless of the number, the  
53  
54 combination, the type, and the strength of evidence of the individual ERAS  
55  
56 component.<sup>33;34</sup> Second, the common-effects GEE analysis was influenced by the  
57  
58  
59  
60

1  
2  
3 higher frequencies of prolonged ICU length of stay (12%) and hospital readmissions  
4 (6%) events than other components included in the definition of failure. Our sample  
5 size was small for the use an average relative-effect GEE analysis<sup>20</sup> to address this  
6 problem. There is a potential for residual confounding despite the use of multivariate  
7 analyses in this cohort study. The applicability of the identified risk factors to select  
8 patients suitable for ERAHBPS programs in other settings requires further validation.  
9  
10 Finally, the failure outcomes were limited to the early to intermediate phases of  
11 recovery; we did not measure outpatient complications<sup>31</sup> or late recovery outcomes,  
12 such as functional status and health-related quality of life beyond one month as  
13 recommended recently by Neville et al.<sup>35</sup>  
14  
15  
16  
17  
18  
19  
20  
21  
22  
23  
24  
25  
26  
27

28 In conclusion, patients who smoked, had elevated preoperative ALT/GPT or  
29 experienced postoperative morbidities were at risk of failing enhanced recovery  
30 protocols in major HBP surgery and may benefit from additional care. Patients who  
31 failed enhanced recovery protocols in HBP surgery stayed in ICU and in the hospital  
32 longer.  
33  
34  
35  
36  
37  
38  
39  
40

#### 41 **Acknowledgements**

42  
43 **Funding Support:** The work was substantially supported by the Health and Health  
44 Services Research Fund, Food and Health Bureau, Hong Kong SAR Government  
45 (Grant number: 08090311). The funding source had no role in the design, conduct or  
46 analysis of the study, or in the decision to submit the manuscript for publication.  
47  
48  
49  
50

51  
52 **Competing Interests:** None declared.  
53

54 **Ethics approval:** The Joint Chinese University of Hong Kong-New Territories East  
55 Cluster Clinical Research Ethics Committee approved this cohort study of patients  
56  
57  
58  
59  
60

1  
2  
3 undergoing major HBP surgery at the Prince of Wales Hospital in Hong Kong  
4  
5 between January 2011 and November 2012 (CRE-2013.181).  
6

7 **Contributors:** AL performed the statistical analyses and had full access to all the  
8 data in the study. AL drafted the manuscript and made substantial revisions. All  
9 authors were involved in the study concept and design of the study. CHC collected  
10 the data. AL, MWAC, CDC, KFL, YSC and BSPL interpreted the data. All authors  
11 made critical revisions of the manuscript for important intellectual content and  
12 approved the final version of the manuscript. AL is guarantor.  
13  
14  
15  
16  
17  
18  
19

20 **Data sharing:** No additional data available  
21

22 **Provenance and peer review:** Not commissioned, externally peer reviewed.  
23  
24  
25  
26  
27  
28  
29  
30  
31  
32  
33  
34  
35  
36  
37  
38  
39  
40  
41  
42  
43  
44  
45  
46  
47  
48  
49  
50  
51  
52  
53  
54  
55  
56  
57  
58  
59  
60



## References

- (1) Spelt L, Ansari D, Stureson C, et al. Fast-track programmes for hepatopancreatic resections: where do we stand? *HPB (Oxford)* 2011; 13(12):833-838.
- (2) Hall TC, Dennison AR, Bilku DK, et al. Enhanced recovery programmes in hepatobiliary and pancreatic surgery: a systematic review. *Ann R Coll Surg Engl* 2012; 94(5):318-326.
- (3) Lin DX, Li X, Ye QW, et al. Implementation of a fast-track clinical pathway decreases postoperative length of stay and hospital charges for liver resection. *Cell Biochem Biophys* 2011; 61(2):413-419.
- (4) Wong-Lun-Hing EM, van Dam RM, Heijnen LA, et al. Is Current Perioperative Practice in Hepatic Surgery Based on Enhanced Recovery After Surgery (ERAS) Principles? *World J Surg* 2013.
- (5) Schultz NA, Larsen PN, Klarskov B, et al. Evaluation of a fast-track programme for patients undergoing liver resection. *Br J Surg* 2013; 100(1):138-143.
- (6) Sanchez-Perez B, Aranda-Narvaez JM, Suarez-Munoz MA, et al. Fast-track program in laparoscopic liver surgery: Theory or fact? *World J Gastrointest Surg* 2012; 4(11):246-250.
- (7) Dimick JB, Pronovost PJ, Lipsett PA. The Effect of ICU Physician Staffing and Hospital Volume on Outcomes After Hepatic Resection. *J Intens Care Med* 2002; 17:41-47.
- (8) Constantinides VA, Tekkis PP, Fazil A, et al. Fast-track failure after cardiac surgery: development of a prediction model. *Crit Care Med* 2006; 34(12):2875-2882.
- (9) Lee A, Zhu F, Underwood MJ, et al. Fast-track failure after cardiac surgery: external model validation and implications to ICU bed utilization. *Crit Care Med* 2013; 41(5):1205-1213.
- (10) Lee A, Chui PT, Chiu CH, et al. Risk of perioperative respiratory complications and postoperative morbidity in a cohort of adults exposed to passive smoking. *Ann Surg* 2014; Feb 6 [epub ahead].
- (11) Lee KF, Cheung YS, Chong CN, et al. Laparoscopic versus open hepatectomy for liver tumours: a case control study. *Hong Kong Med J* 2007; 13(6):442-448.
- (12) Lee KF, Cheung YS, Wong J, et al. Randomized clinical trial of open hepatectomy with or without intermittent Pringle manoeuvre. *Br J Surg* 2012; 99(9):1203-1209.

- 1  
2  
3 (13) Shontz R, Karuparth V, Temple R, et al. Prevalence and risk factors  
4 predisposing to coagulopathy in patients receiving epidural analgesia for  
5 hepatic surgery. *Reg Anesth Pain Med* 2009; 34(4):308-311.  
6  
7 (14) Maessen JM, Dejong CH, Kessels AG, et al. Length of stay: an inappropriate  
8 readout of the success of enhanced recovery programs. *World J Surg* 2008;  
9 32(6):971-975.  
10  
11 (15) Reynolds PQ, Sanders NW, Schildcrout JS, et al. Expansion of the surgical  
12 Apgar score across all surgical subspecialties as a means to predict  
13 postoperative mortality. *Anesthesiology* 2011; 114(6):1305-1312.  
14  
15 (16) Knaus WA, Draper EA, Wagner DP, et al. APACHE II: a severity of disease  
16 classification system. *Crit Care Med* 1985; 13(10):818-829.  
17  
18 (17) Grocott MP, Browne JP, Van der Meulen J, et al. The Postoperative Morbidity  
19 Survey was validated and used to describe morbidity after major surgery. *J*  
20 *Clin Epidemiol* 2007; 60(9):919-928.  
21  
22 (18) Shaw JW, Johnson JA, Coons SJ. US valuation of the EQ-5D health states:  
23 development and testing of the D1 valuation model. *Med Care* 2005;  
24 43(3):203-220.  
25  
26 (19) Jones C, Kelliher L, Dickinson M, et al. Randomized clinical trial on enhanced  
27 recovery versus standard care following open liver resection. *Br J Surg* 2013;  
28 100(8):1015-1024.  
29  
30 (20) Mascha EJ, Sessler DI. Statistical grand rounds: design and analysis of  
31 studies with binary- event composite endpoints: guidelines for anesthesia  
32 research. *Anesth Analg* 2011; 112(6):1461-1471.  
33  
34 (21) SRNT Subcommittee on biochemical verification. Biochemical verification of  
35 tobacco use and cessation. *Nicotine Tob Res* 2002; 4(2):149-159.  
36  
37 (22) Coolson MM, van Dam RM, van der Wilt AA, et al. Systematic review and  
38 meta-analysis of enhanced recovery after pancreatic surgery with particular  
39 emphasis on pancreaticoduodenectomies. *World J Surg* 2013; 37(8):1909-  
40 1918.  
41  
42 (23) Coolson MM, Wong-Lun-Hing EM, van Dam RM, et al. A systematic review of  
43 outcomes in patients undergoing liver surgery in an enhanced recovery after  
44 surgery pathways. *HPB (Oxford)* 2013; 15(4):245-251.  
45  
46 (24) Pearse RM, Moreno RP, Bauer P, et al. Mortality after surgery in Europe: a 7  
47 day cohort study. *Lancet* 2012; 380(9847):1059-1065.  
48  
49 (25) Jorgensen CC, Kehlet H. Outcomes in smokers and alcohol users after fast-  
50 track hip and knee arthroplasty. *Acta Anaesthesiol Scand* 2013; 57(5):631-  
51 638.  
52  
53  
54  
55  
56  
57  
58  
59  
60

- 1  
2  
3 (26) Lee A, Gin T, Chui PT, et al. The accuracy of urinary cotinine immunoassay  
4 test strip as an add-on test to self-reported smoking before major elective  
5 surgery. *Nicotine Tob Res* 2013; 15(10):1690-1695.  
6  
7 (27) Wong J, Lam DP, Abrishami A, et al. Short-term preoperative smoking  
8 cessation and postoperative complications: a systematic review and meta-  
9 analysis. *Can J Anaesth* 2012; 59(3):268-279.  
10  
11 (28) Schroeder RA, Marroquin CE, Bute BP, et al. Predictive indices of morbidity  
12 and mortality after liver resection. *Ann Surg* 2006; 243(3):373-379.  
13  
14 (29) Taketomi A, Kitagawa D, Itoh S, et al. Trends in morbidity and mortality after  
15 hepatic resection for hepatocellular carcinoma: an institute's experience with  
16 625 patients. *J Am Coll Surg* 2007; 204(4):580-587.  
17  
18 (30) Davies SJ, Francis J, Dilley J, et al. Measuring outcomes after major  
19 abdominal surgery during hospitalization: reliability and validity of the  
20 Postoperative Morbidity Survey. *Perioper Med (Lond)* 2013; 2(1):1.  
21  
22 (31) Lucas DJ, Sweeney JF, Pawlik TM. The timing of complications impacts risk  
23 of readmission after hepatopancreatobiliary surgery. *Surgery* 2014;  
24 155(5):945-953.  
25  
26 (32) Barton GR, Sach TH, Doherty M, et al. An assessment of the discriminative  
27 ability of the EQ-5Dindex, SF-6D, and EQ VAS, using sociodemographic  
28 factors and clinical conditions. *Eur J Health Econ* 2008; 9(3):237-249.  
29  
30 (33) Gianotti L, Beretta S, Luperto M, B et al. Enhanced recovery strategies in  
31 colorectal surgery: is the compliance with the whole program required to  
32 achieve the target? *Int J Colorectal Dis* 2014; 29(3):329-341.  
33  
34 (34) Nicholson A, Lowe MC, Parker J, et al. Systematic review and meta-analysis  
35 of enhanced recovery programmes in surgical patients. *Br J Surg* 2014;  
36 101(3):172-188.  
37  
38 (35) Neville A, Lee L, Antonescu I, et al. Systematic review of outcomes used to  
39 evaluate enhanced recovery after surgery. *Br J Surg* 2014; 101(3):159-171.  
40  
41  
42  
43  
44  
45  
46  
47  
48  
49  
50  
51  
52  
53  
54  
55  
56  
57  
58  
59  
60

1  
2  
3 Figure 1. The incidence of postoperative morbidities on the third day after surgery by  
4 enhanced recovery protocol groups. To control for type I error at 0.05 from multiple  
5 comparisons,  $P < 0.0063$  was considered significant  
6  
7  
8  
9  
10  
11  
12  
13  
14  
15  
16  
17  
18  
19  
20  
21  
22  
23  
24  
25  
26  
27  
28  
29  
30  
31  
32  
33  
34  
35  
36  
37  
38  
39  
40  
41  
42  
43  
44  
45  
46  
47  
48  
49  
50  
51  
52  
53  
54  
55  
56  
57  
58  
59  
60

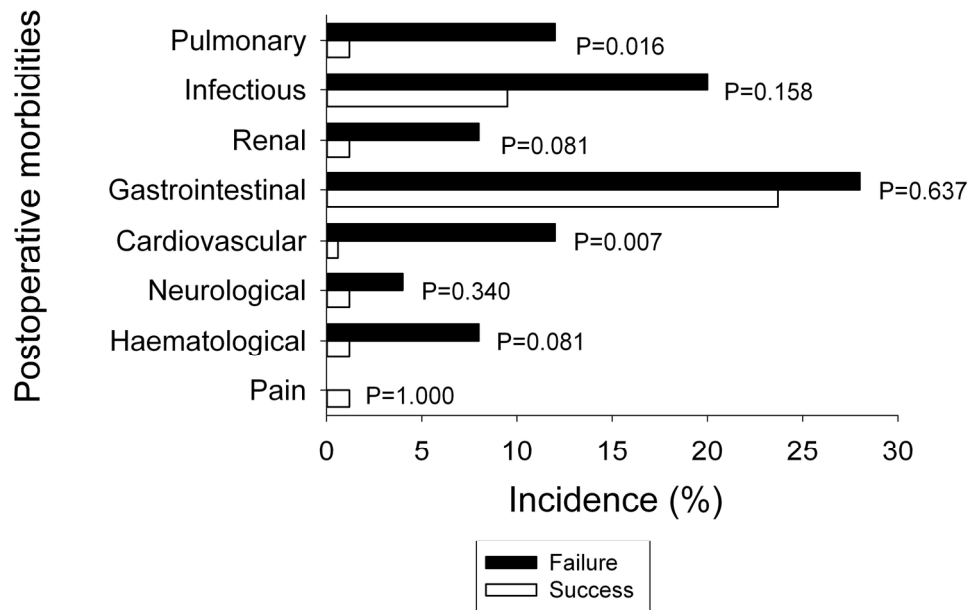

29 The incidence of postoperative morbidities on the third day after surgery by enhanced recovery protocol  
30 groups. To control for type 1 error at 0.05 from multiple comparisons,  $P < 0.0063$  was considered  
31 significant.

32 86x56mm (600 x 600 DPI)

STROBE Statement—Checklist of items that should be included in reports of *cohort studies*

|                              | Item No | Recommendation                                                                                                                                                                                    | Page                     |
|------------------------------|---------|---------------------------------------------------------------------------------------------------------------------------------------------------------------------------------------------------|--------------------------|
| <b>Title and abstract</b>    | 1       | (a) Indicate the study's design with a commonly used term in the title or the abstract                                                                                                            | 1                        |
|                              |         | (b) Provide in the abstract an informative and balanced summary of what was done and what was found                                                                                               | 2                        |
| <b>Introduction</b>          |         |                                                                                                                                                                                                   |                          |
| Background/rationale         | 2       | Explain the scientific background and rationale for the investigation being reported                                                                                                              | 4-5                      |
| Objectives                   | 3       | State specific objectives, including any prespecified hypotheses                                                                                                                                  | 5                        |
| <b>Methods</b>               |         |                                                                                                                                                                                                   |                          |
| Study design                 | 4       | Present key elements of study design early in the paper                                                                                                                                           | 5                        |
| Setting                      | 5       | Describe the setting, locations, and relevant dates, including periods of recruitment, exposure, follow-up, and data collection                                                                   | 5-9                      |
| Participants                 | 6       | (a) Give the eligibility criteria, and the sources and methods of selection of participants. Describe methods of follow-up                                                                        | 5                        |
|                              |         | (b) For matched studies, give matching criteria and number of exposed and unexposed                                                                                                               | NA                       |
| Variables                    | 7       | Clearly define all outcomes, exposures, predictors, potential confounders, and effect modifiers. Give diagnostic criteria, if applicable                                                          | 8-9                      |
| Data sources/<br>measurement | 8*      | For each variable of interest, give sources of data and details of methods of assessment (measurement). Describe comparability of assessment methods if there is more than one group              | 8-9                      |
| Bias                         | 9       | Describe any efforts to address potential sources of bias                                                                                                                                         | 9                        |
| Study size                   | 10      | Explain how the study size was arrived at                                                                                                                                                         | 10                       |
| Quantitative variables       | 11      | Explain how quantitative variables were handled in the analyses. If applicable, describe which groupings were chosen and why                                                                      | 9, Tables 2-4, footnotes |
| Statistical methods          | 12      | (a) Describe all statistical methods, including those used to control for confounding                                                                                                             | 9-10                     |
|                              |         | (b) Describe any methods used to examine subgroups and interactions                                                                                                                               | NA                       |
|                              |         | (c) Explain how missing data were addressed                                                                                                                                                       | No missing data          |
|                              |         | (d) If applicable, explain how loss to follow-up was addressed                                                                                                                                    | NA                       |
|                              |         | (e) Describe any sensitivity analyses                                                                                                                                                             | 9-10                     |
| <b>Results</b>               |         |                                                                                                                                                                                                   |                          |
| Participants                 | 13*     | (a) Report numbers of individuals at each stage of study—eg numbers potentially eligible, examined for eligibility, confirmed eligible, included in the study, completing follow-up, and analysed | 10                       |
|                              |         | (b) Give reasons for non-participation at each stage                                                                                                                                              | 10                       |
|                              |         | (c) Consider use of a flow diagram                                                                                                                                                                | Text adequate            |
| Descriptive data             | 14*     | (a) Give characteristics of study participants (eg demographic, clinical, social) and information on exposures and potential confounders                                                          | Table 2                  |
|                              |         | (b) Indicate number of participants with missing data for each variable of interest                                                                                                               | No missing data          |

|                          |     |                                                                                                                                                                                                              |                      |
|--------------------------|-----|--------------------------------------------------------------------------------------------------------------------------------------------------------------------------------------------------------------|----------------------|
|                          |     | (c) Summarise follow-up time (eg, average and total amount)                                                                                                                                                  | 10,11                |
| Outcome data             | 15* | Report numbers of outcome events or summary measures over time                                                                                                                                               | 9                    |
| Main results             | 16  | (a) Give unadjusted estimates and, if applicable, confounder-adjusted estimates and their precision (eg, 95% confidence interval). Make clear which confounders were adjusted for and why they were included | Tables 3 &4, 9,14-15 |
|                          |     | (b) Report category boundaries when continuous variables were categorized                                                                                                                                    | Tables footnotes     |
|                          |     | (c) If relevant, consider translating estimates of relative risk into absolute risk for a meaningful time period                                                                                             | NA                   |
| Other analyses           | 17  | Report other analyses done—eg analyses of subgroups and interactions, and sensitivity analyses                                                                                                               | 15                   |
| <b>Discussion</b>        |     |                                                                                                                                                                                                              |                      |
| Key results              | 18  | Summarise key results with reference to study objectives                                                                                                                                                     | 15-18,19-20          |
| Limitations              | 19  | Discuss limitations of the study, taking into account sources of potential bias or imprecision. Discuss both direction and magnitude of any potential bias                                                   | 19                   |
| Interpretation           | 20  | Give a cautious overall interpretation of results considering objectives, limitations, multiplicity of analyses, results from similar studies, and other relevant evidence                                   | 15-19                |
| Generalisability         | 21  | Discuss the generalisability (external validity) of the study results                                                                                                                                        | 19                   |
| <b>Other information</b> |     |                                                                                                                                                                                                              |                      |
| Funding                  | 22  | Give the source of funding and the role of the funders for the present study and, if applicable, for the original study on which the present article is based                                                | 20                   |

\*Give information separately for exposed and unexposed groups.

**Note:** An Explanation and Elaboration article discusses each checklist item and gives methodological background and published examples of transparent reporting. The STROBE checklist is best used in conjunction with this article (freely available on the Web sites of PLoS Medicine at <http://www.plosmedicine.org/>, Annals of Internal Medicine at <http://www.annals.org/>, and Epidemiology at <http://www.epidem.com/>). Information on the STROBE Initiative is available at <http://www.strobe-statement.org>.

1  
2  
3 **Factors associated with failure of enhanced recovery protocol in patients**  
4 **undergoing major hepatobiliary and pancreatic surgery: a retrospective cohort**  
5 **study**  
6  
7  
8  
9

10  
11 Anna LEE<sup>1</sup> , Chun Hung CHIU<sup>1</sup> , Mui Wai Amy CHO<sup>1</sup> , Charles David

12  
13 GOMERSALL<sup>1</sup> , Kit Fai LEE<sup>2</sup> , Yue Sun CHEUNG<sup>2</sup> , Paul Bo San LAI<sup>2</sup>  
14  
15  
16

17  
18 <sup>1</sup> Department of Anaesthesia and Intensive Care, Prince of Wales Hospital, The  
19  
20 Chinese University of Hong Kong  
21  
22

23 <sup>2</sup> Division of Hepatobiliary and Pancreatic Surgery, Department of Surgery, Prince of  
24  
25 Wales Hospital, The Chinese University of Hong Kong  
26  
27  
28

29  
30 **Address for correspondence:** Anna Lee, Department of Anaesthesia and  
31  
32 Intensive Care, Prince of Wales Hospital, The Chinese University of Hong Kong,  
33  
34 Shatin, New Territories, Hong Kong  
35

36 Phone: +852 2632 2735 Fax: +852 2637 2422 Email: [annalee@cuhk.edu.hk](mailto:annalee@cuhk.edu.hk)  
37  
38

39 **Reprints:** Reprints will not be available from the authors  
40

41 **Category:** Research article  
42

43 **Meeting:** Presented in part at the combined Royal Australasian College of Surgeons  
44  
45 Annual Scientific Congress and the Australian and New Zealand College of  
46  
47 Anaesthetists and Faculty of Pain Medicine Annual Scientific Meeting, in Singapore,  
48  
49 5<sup>th</sup>-9<sup>th</sup> May 2014.  
50  
51

52 **MESH terms:** Enhanced recovery after surgery; Postoperative care; Liver surgery;  
53  
54 Pancreatic surgery; Cohort  
55

56 **Word count:** 251 (Abstract); 4083 (Main text, including tables and figures)  
57  
58  
59  
60



**ABSTRACT**

**Objective:** This study examined the risk factors associated with failure of enhanced recovery protocol after major hepatobiliary and pancreatic (HBP) surgery.

**Setting and participants:** A retrospective cohort of 194 adults patients undergoing major HBP surgery at a university hospital in Hong Kong was followed up for 30 days.

The patients were from a larger cohort study of 736 consecutive adults with preoperative urinary cotinine concentration to examine the association between passive smoking and risk of perioperative respiratory complications and postoperative morbidities.

**Outcome measures:** The primary outcome was failure of enhanced recovery protocol. This was defined as a composite measure of the following events: intensive care unit (ICU) stay more than 24 hours after surgery, unplanned admission to ICU within 30 days after surgery, hospital readmission, reoperation and mortality.

**Results:** There were 25 failures of enhanced recovery after HBP surgery (12.9%, 95% CI, 8.5% to 18.4%). After adjusting for elective ICU admission, smokers (RR 2.21, 95% CI, 1.10 to 4.46), high preoperative alanine transaminase/glutamic-pyruvic transaminase (RR 3.55, 1.68 to 7.49) and postoperative morbidities (RR 2.69, 95% CI, 1.30 to 5.56) were associated with failures of enhanced recovery in the generalized estimating equation risk model. Compared to those managed successfully, failures stayed longer in ICU (median 19 vs. 25 hours,  $P < 0.001$ ) and in hospital for postoperative care (median 7 vs. 13 days,  $P = 0.003$ ).

**Conclusion:** Smokers and patients having high preoperative alanine transaminase/glutamic-pyruvic transaminase concentration or have a high risk of postoperative morbidities are likely to fail enhanced recovery protocol in HBP surgery programs.

### Strengths and limitations of this study

- This is the first study to identify risk factors associated with the failure of enhanced recovery protocol in major hepatobiliary and pancreatic surgery.
- Instead of using length of hospital stay as an endpoint, failure was defined as a composite measure of slow recovery: length of stay in the intensive care unit (ICU) more than 24 hours after surgery, unplanned admission to ICU within 30 days, readmission to the hospital within 30 days after surgery, reoperation for complications and 30-day mortality
- Smokers (defined by self-reported history and adjusted urinary cotinine concentration) and patients having high preoperative alanine transaminase glutamic-pyruvic transaminase concentration or have a high risk of postoperative morbidities are likely to fail clinical pathways in fast-track hepatobiliary and pancreatic surgery. Similar results were found in a sensitivity analysis using adjusted urinary cotinine concentrations.
- We did not consider the compliance rate of individual components of the early recovery after hepatobiliary pancreatic surgery program
- High risk patients at risk of failing enhanced recovery protocols in major hepatobiliary pancreatic surgery may benefit from additional care to minimize perioperative morbidities and length of stay.

## INTRODUCTION

Enhanced recovery after major hepatobiliary and pancreatic surgery (ERAHBPS) is a complex intervention that includes many of the following components: patient and family education, no bowel preparation, no preanaesthetic medication, preoperative carbohydrate loading, thromboembolic prophylaxis, antiemetic prophylaxis, epidural analgesia, intraoperative normothermia, prophylactic antibiotics, no systemic opioids, fluid restriction, no surgical drains, no standard postoperative nasogastric tubes, postoperative nutritional care and early mobilization.<sup>1</sup>

Recent systematic reviews<sup>1,2</sup> of several observational studies of ERAHBPS programs suggest that it is safe and feasible. Compared to traditional clinical pathways, fast-track hepatobiliary and pancreatic (HBP) surgery programs have similar risks of readmission, morbidity and mortality<sup>1-3</sup> and reduced the duration of postoperative length of stay and overall hospital cost.<sup>3</sup> However, compliance with core components of enhance recovery after liver surgery program vary between high-volume European centers, with a median adoption of 9 (range 7 to 12) of 22 core elements.<sup>4</sup>

As with all enhanced recovery after surgery (ERAS) programs, a small proportion of patients will fail fast-track HBP surgery and require additional intensive care unit (ICU) resources. Although not all fast-track HBP surgical patients are routinely admitted to ICU after their procedure,<sup>5,6</sup> ICU care after liver resection was associated with a decreased risk in hospital mortality (odds ratio 0.26, 95% CI 0.10 to 0.71) and a reduction in total hospital costs (13%).<sup>7</sup> These results suggest that careful selection

1  
2  
3 of patients for ERAHBPS is crucial for maximizing the efficiency of perioperative care  
4  
5 pathways.  
6  
7

8  
9  
10 Fast-track failure risk models after cardiac surgery have been developed<sup>8</sup> and  
11 externally validated<sup>9</sup> to facilitate the planning of perioperative care pathways, but  
12 factors associated with failure of enhanced recovery protocol after HBP surgery are  
13 unknown. The objectives of this study were to estimate the incidence of and identify  
14 the risk factors associated with failure of enhanced recovery protocol after HBP  
15 surgery. And with such information, we can identify a subgroup of patients at risk of  
16 failure to provide additional care to minimize perioperative morbidities and length of  
17 stay.  
18  
19  
20  
21  
22  
23  
24  
25  
26  
27

## 28 29 30 **METHODS**

### 31 32 **Study cohort**

33  
34 The Joint Chinese University of Hong Kong-New Territories East Cluster Clinical  
35 Research Ethics Committee approved this retrospective cohort study of patients  
36 undergoing major HBP surgery at the Prince of Wales Hospital in Hong Kong  
37 between January 2011 and November 2012 (CRE-2013.181). The patients were  
38 from a larger cohort study of 736 consecutive adult patients with preoperative urinary  
39 cotinine concentration to examine the association between passive smoking and risk  
40 of perioperative respiratory complications and postoperative morbidities.<sup>10</sup> All  
41 patients gave written informed consent before surgery. Patients undergoing other  
42 types of surgery, unable to give written informed consent, having chronic renal failure,  
43 younger than 18 years and urine cotinine samples collected more than 48 h before  
44 surgery were excluded.  
45  
46  
47  
48  
49  
50  
51  
52  
53  
54  
55  
56  
57  
58  
59  
60

1  
2  
3  
4  
5 The types of surgery included were laparoscopic liver resection (nonanatomical  
6 wedge resections, or resection of 1 or 2 segments), minor open liver resection (fewer  
7 than 3 segments including multiple non-anatomical resections), major open liver  
8 resections (3 or more segments), liver resection with biliary reconstruction<sup>11;12</sup> and  
9 pancreatic surgery. Pancreatic surgery included Whipple's procedure, double bypass  
10 (hepaticojejunostomy and gastrojejunostomy in unresectable cancer of the head of  
11 pancreas) and distal pancreatectomy.  
12  
13  
14  
15  
16  
17  
18  
19  
20

### 21 22 23 **Typical management**

24 The typical clinical care pathway for HBP surgical patients involved the following:  
25 admission to surgical ward one day before surgery, patient education, no  
26 preanaesthetic medication, mechanical prophylaxis for deep vein thrombosis,  
27 intraoperative prophylactic antibiotics, normothermia during surgery, ICU or surgical  
28 ward for first 24 h after surgery, surgical ward, early mobilization and hospital  
29 discharge (Table 1). The use of epidural anaesthesia/analgesia is not routine  
30 because of concerns about postoperative coagulopathy in patients with cirrhosis of  
31 liver.<sup>13</sup> Patients were given patient controlled morphine analgesia.  
32  
33  
34  
35  
36  
37  
38  
39  
40  
41  
42  
43  
44

45 Although there was no formalized extubation protocol, extubation at the end of liver  
46 resection surgery or within 1 h after admission to ICU was expected; for pancreatic  
47 surgery where most patients went to ICU, extubation within 4 h was expected. There  
48 is no surgical high dependency unit at the Prince of Wales Hospital, Hong Kong.  
49  
50  
51  
52  
53  
54  
55  
56  
57  
58  
59  
60

Drains were removed as soon as possible when there was no biliary or pancreatic anastomotic leakage. In patients undergoing liver surgery, gradual resumption of diet from liquid to solid food was expected during the first three days after surgery. For Whipple's operation, the diet resumption was slower, starting from the fifth postoperative day and a normal diet was expected by the seventh. For patients who could not tolerate oral intake by the seventh day after surgery, parenteral nutrition was given with a target of 25-30kcal/kg.

Table 1. Enhanced recovery elements in liver and pancreatic resectional surgery

|                 | Liver resection                                                                                                                                                                | Pancreatic resection                                                                                                                                                                              |
|-----------------|--------------------------------------------------------------------------------------------------------------------------------------------------------------------------------|---------------------------------------------------------------------------------------------------------------------------------------------------------------------------------------------------|
| Pre-operatively | Information given to patient and patient education<br>No premedication                                                                                                         | Information given to patient and patient education<br>No premedication                                                                                                                            |
| Day 0           | Normothermia during surgery<br>Mechanical prophylaxis for deep vein thrombosis<br>Intraoperative prophylactic antibiotics<br>No nasogastric tube<br>No routine abdominal drain | Normothermia during surgery<br>Mechanical prophylaxis for deep vein thrombosis<br>Intraoperative prophylactic antibiotics<br>Routine nasogastric and abdominal drain only for Whipple's operation |
| Day 1           | Patient controlled morphine analgesia<br>Oral fluid<br>Moving patient to chair                                                                                                 | Patient controlled morphine analgesia<br>Oral fluid<br>Moving patient to chair                                                                                                                    |
| Day 2           | Fluid diet<br>Enhanced mobilization<br>Removal of urinary catheter                                                                                                             | Enhanced mobilization                                                                                                                                                                             |
| Day 3           | Soft diet<br>Removal of drain                                                                                                                                                  | Removal of urinary catheter<br>Removal of nasogastric tube if draining <300ml                                                                                                                     |
| Day 4           | Normal diet                                                                                                                                                                    | Fluid diet<br>Removal of drain                                                                                                                                                                    |
| Day 5           | Discharge if no fever, pain can be controlled with oral analgesics and patient has adequate mobilization                                                                       | Soft diet                                                                                                                                                                                         |
| Day 6           |                                                                                                                                                                                | Normal diet                                                                                                                                                                                       |
| Day 7           |                                                                                                                                                                                | Discharge if no fever, pain can be controlled with oral analgesics and patient has adequate mobilization                                                                                          |

## Outcome Measure

For the purposes of this study, we define failure of enhanced recovery protocol after HBP surgery as a composite measure of the following events: length of ICU stay more than 24 h after surgery, unplanned admission to ICU within 30 days after surgery, readmission to the hospital within 30 days after surgery, reoperation for complications and 30-day mortality. These events were chosen as markers of slow recovery and are common quality of care indicators. Unlike previous ERAS studies, we did not chose length of stay as a primary outcome as it has been shown that reductions in length of stay up to a median of 2 days may be related to changes in organization of care and not to the effect of the ERAS program.<sup>14</sup>

We collected patient demographics, smoking status, preoperative urinary cotinine concentration that was adjusted for creatinine level, American Society of Anesthesiologists' Physical Status, Surgical Apgar score,<sup>15</sup> duration of surgery, ICU admission details, APACHE II (severity of illness score in patients admitted to ICU),<sup>16</sup> preoperative liver function tests, indocyanine green test and coagulation tests, and failure events from the hospital electronic Clinical Management System database. The research staff collected postoperative morbidities (pulmonary, infectious, renal, gastrointestinal, cardiovascular, neurological, haematological, wound and severe pain) on the third day after surgery using a reliable and valid Postoperative Morbidity Survey questionnaire.<sup>17</sup> The EQ-5D index, a health-related quality of life using a US set of reference weights, was measured on the third day after surgery<sup>18</sup> as the greatest difference in EQ-5D index between ERAHBPS and standard care occur between postoperative day 2 and 5.<sup>19</sup> Current smoking was defined as no smoking cessation within 2 months before surgery or the patient had an adjusted urinary

1  
2  
3 cotinine concentration  $\geq 550$  ng/mL within 48 hours before surgery.<sup>10</sup> The research  
4  
5 staff was blinded to the urinary cotinine concentration results.  
6  
7

### 8 9 10 **Statistical Analysis**

11  
12 Continuous data were expressed as mean and standard deviation (SD) or median  
13  
14 and interquartile range (IQR). The 95% confidence interval (95% CI) was estimated  
15  
16 around the incidence of HBP surgery failure. Appropriate Student t-tests, Mann-  
17  
18 Whitney U tests,  $\chi^2$  analyses or exact tests were used to compare factors associated  
19  
20 with failure of enhanced recovery protocol. To adjust for multiple testing of individual  
21  
22 postoperative morbidity events, a Bonferroni correction was used so that the  
23  
24 significance criterion was set at  $P < 0.0063$ . There was no missing data.  
25  
26  
27

28  
29  
30 A generalized estimating equation (GEE) model with a Poisson distribution, log-link  
31  
32 function and exchangeable correlation<sup>20</sup> was used to obtain a common-effect relative  
33  
34 risk (RR) of failure of enhanced recovery protocol after HBP surgery. This GEE  
35  
36 model was more appropriate for analysis of composite measures and assumes that  
37  
38 there is a single common exposure effect across all components used in the failure  
39  
40 composite endpoint. We included elective ICU admission in the model as we  
41  
42 considered this factor to be clinically important with regards to postoperative bed  
43  
44 utilization. The calibration and discrimination of the model was assessed using the  
45  
46 Hosmer-Lemeshow goodness-of-fit test and estimating the area under the receiver  
47  
48 characteristic operating curve (AUROC). Internal validation of the model was  
49  
50 performed by bootstrapping 1000 samples and estimating the AUROC and 95% CI.  
51  
52

53  
54 **A sensitivity analysis of the GEE model was performed by including adjusted urinary**  
55  
56 **cotinine concentration as a continuous variable instead of smoking status as a**  
57  
58  
59  
60



1  
2  
3 **categorical independent variable.** Statistical analyses were performed using STATA  
4  
5 (version 13.1) software (STATA Corp, College Station, TX).  
6  
7

8  
9  
10 Using PASS (version 11) software (NCSS, Kaysville, UT), a sample size of 190 (19  
11 failure and 171 success) patients will achieve 80% power to detect a difference of  
12  
13 0.20 between the AUROC under the null hypothesis of 0.70 (fair discrimination) and  
14  
15 an AUROC under the alternative hypothesis of 0.50 (no discrimination) using a 2-  
16  
17 sided z-test at a significance level of 0.05.  
18  
19

## 20 21 22 **RESULTS**

23  
24 Of the 217 consecutive patients undergoing HBP surgery, 23 were not eligible (10  
25  
26 not available in the ward at time of recruitment, 5 refusals, 4 already participated in  
27  
28 the study, 3 unable to consent and 1 had renal impairment). There were 25 failures  
29  
30 of enhanced recovery (12.9%, 95% CI, 8.5% to 18.4%) in 194 patients undergoing  
31  
32 major HBP surgery. Of the 94 elective ICU patients, 10 (10.6%) stayed in ICU for  
33  
34 more than 24 hours after surgery. One patient was admitted to ICU unexpectedly  
35  
36 due to surgical emphysema and stayed in ICU for 43 hours after surgery. There were  
37  
38 2 (2.1%) readmissions to ICU within 24 hours (1 for acute renal failure/atrial  
39  
40 fibrillation and 1 for atelectasis), 2 reoperations (1.0%) and 11 hospital readmissions  
41  
42 (5.6%). **The reasons for hospital readmissions were abdominal complications (n=5),**  
43  
44 **wound complications (n=3), pyrexia with or without chills (n=2) and jaundice (n=1).**  
45  
46  
47  
48

49 No patient died within 30 days after surgery.  
50  
51

52  
53  
54 The median postoperative length of hospital stay was longer in the failure group (13  
55  
56 days, 7 to 18) than in the successful group (7 days, 6 to 9) (P=0.003). This was  
57  
58  
59  
60

mainly due to longer median length of postoperative hospital stay in patients undergoing hepatic surgery failing enhanced recovery management (12 days, 7 to 17) compared to those successfully managed (7 days, 6 to 9) ( $P=0.001$ ). There were 26 patients undergoing pancreatic surgery. The median duration of postoperative hospital stay in patients undergoing pancreatic surgery failing and succeeding enhanced recovery management were 16 (5 to 35) and 10 (8 to 18) days, respectively ( $P=0.716$ ). The median time from initial hospital discharge to readmission was 6 days (2 to 13).

The demographic and preoperative characteristics associated with failure of enhanced recovery protocol are shown in Table 2. Of the 137 patients with preoperative indocyanine green test results, 14 (7.2%) were classified as borderline and 4 (2.1%) were poor. There was no significant association between indocyanine green test results and failure groups ( $P=0.735$ ).

Table 2 Demographic and preoperative factors associated with failure of enhanced recovery protocol after major hepatobiliary and pancreatic surgery

|                                                               | Enhanced Recovery Protocol Groups |                       | P value |
|---------------------------------------------------------------|-----------------------------------|-----------------------|---------|
|                                                               | Failure (n=25)                    | Success (n=169)       |         |
| Mean age (SD), y                                              | 57 (11)                           | 59 (11)               | 0.498   |
| Males, n (%)                                                  | 19 (76)                           | 131 (78)              | 0.866   |
| American Society of Anesthesiologists' Physical Status, n (%) |                                   |                       |         |
| I                                                             | 2 (8)                             | 25 (15)               | 0.512   |
| II                                                            | 18 (72)                           | 121 (72)              |         |
| III/IV                                                        | 5 (20)                            | 23 (14)               |         |
| Current smoker, n (%)                                         | 9 (36)                            | 35 (21)               | 0.088   |
| Median adjusted cotinine, ng/mL (IQR)                         | 1.34<br>(0.60 – 265.82)           | 1.07<br>(0.55 – 3.51) | 0.183   |
| Type of Surgery, n (%)                                        |                                   |                       |         |
| Exploratory                                                   | 1 (4)                             | 5 (3)                 | 0.441   |
| Laparoscopic liver resection                                  | 3 (12)                            | 28 (17)               |         |
| Minor open liver resection                                    | 5 (20)                            | 62 (37)               |         |
| Major open liver ± biliary reconstruction                     | 12 (48)                           | 52 (31)               |         |
| Whipple                                                       | 2 (8)                             | 15 (9)                |         |
| Other pancreatic surgery                                      | 2 (8)                             | 7 (4)                 |         |
| Magnitude of Surgery, n (%)                                   |                                   |                       |         |

1  
2  
3  
4  
5  
6  
7  
8  
9  
10  
11  
12  
13  
14  
15  
16  
17  
18  
19  
20  
21  
22  
23  
24  
25  
26  
27  
28  
29  
30  
31  
32  
33  
34  
35  
36  
37  
38  
39  
40  
41  
42  
43  
44  
45  
46  
47  
48  
49  
50  
51  
52  
53  
54  
55  
56  
57  
58  
59  
60

|                                                 |         |          |       |
|-------------------------------------------------|---------|----------|-------|
| Major                                           | 4 (16)  | 36 (21)  | 0.541 |
| Ultramajor                                      | 21 (84) | 133 (79) |       |
| Low albumin (<35 g/L), n (%)                    | 2 (4)   | 12 (7)   | 0.698 |
| High bilirubin ( $\mu\text{mol/L}$ )*, n(%)     | 7 (28)  | 27 (16)  | 0.159 |
| Alkaline Phosphatase (IU/L), n (%)              |         |          |       |
| Normal <sup>†</sup>                             | 14 (56) | 123 (73) |       |
| Low                                             | 1 (4)   | 3 (2)    | 0.214 |
| High                                            | 10 (40) | 43 (25)  |       |
| High ALT/GPT(IU/L) <sup>‡</sup> , n (%)         | 11 (44) | 23 (14)  | 0.001 |
| Haemoglobin (g/dL), n (%)                       |         |          |       |
| Normal <sup>§</sup>                             | 14 (56) | 121 (72) |       |
| Low                                             | 10 (40) | 46 (27)  | 0.211 |
| High                                            | 1 (4)   | 2 (1)    |       |
| Platelets, n (%)                                |         |          |       |
| Normal (150-384 x 10 <sup>9</sup> /L)           | 14 (56) | 117 (69) |       |
| Low                                             | 10 (40) | 50 (30)  | 0.294 |
| High                                            | 1 (4)   | 2 (1)    |       |
| Prothrombin time, n (%)                         |         |          |       |
| Normal (9.5-12 s)                               | 19 (76) | 144 (85) |       |
| Low                                             | 0 (0)   | 1 (1)    | 0.423 |
| High                                            | 6 (24)  | 24 (14)  |       |
| Activated partial thromboplastin time, n (%)    |         |          |       |
| Normal (28.2-37.4 s)                            | 22 (88) | 153 (91) |       |
| Low                                             | 2 (8)   | 10 (6)   | 0.914 |
| High                                            | 1 (4)   | 6 (4)    |       |
| High International Normalised Ratio, n (%)      | 0 (0)   | 2 (1)    | 1.000 |
| Urinary Creatinine ( $\mu\text{mol/L}$ ), n (%) |         |          |       |
| Normal <sup>†</sup>                             | 20 (80) | 143 (85) |       |
| Low                                             | 3 (12)  | 17 (10)  | 0.815 |
| High                                            | 2 (8)   | 9 (5)    |       |

\*High bilirubin defined as more than 19 $\mu\text{mol/L}$  in males, and more than 17 $\mu\text{mol/L}$  in females

<sup>†</sup>Age and gender specific range

<sup>‡</sup>High Alanine transaminase/glutamic-pyruvic transaminase defined as more than 67 IU/L in males and more than 55 IU/L in females

<sup>§</sup>Normal range is 13.2 to 17.2g/dL for males and 11.9 to 15.1g/dL for females

The median duration of hepatic surgery was similar between failure (270 min, 186 to 336) and successful enhanced recovery groups (236 min, 180 to 315) (P=0.348).

There was no difference in the median duration of pancreatic surgery between failure (395 min, 192 to 641) and successful enhanced recovery groups (488 min, 291 to 560) (P=0.933). The median Surgical Apgar Score was similar between failure (8, 6 to 9) and successful (8, 7 to 9) enhanced recovery groups (P=0.912).

Elective ICU admissions occurred in 13 (41.9%) patients undergoing laparoscopic liver resection, 19 (23.9%) minor open liver resection, 45 (70.3%) major open liver

1  
2  
3 and/or biliary reconstruction, 15 (88.2%) Whipple and 2 (22.2%) other pancreatic  
4  
5 surgery. Of the 94 elective ICU admissions, 17 (18.1%) patients failed enhanced  
6  
7 recovery protocols after HBP surgery. Patients with elective ICU admissions were  
8  
9 more likely to be enhanced recovery failures than patients sent to the ward after  
10  
11 surgery ( $RR_{unadjusted}$  1.49, 95% CI, 1.09 to 2.05). The median duration of ICU length  
12  
13 of stay was longer in the failure group (25 hours, 20 to 39) than in the successful  
14  
15 enhanced recovery group (19 hours, 17 to 22) ( $P < 0.001$ ). However, the mean  
16  
17 APACHE II score was similar between failure ( $13.6 \pm 3.8$ ) and successful ( $12.3 \pm 3.5$ )  
18  
19 enhanced recovery groups ( $P = 0.150$ ).  
20  
21  
22  
23  
24

25 The overall incidence of postoperative morbidities was 35.1% (95% CI, 28.4% to  
26  
27 42.2%). There was no reported wound dehiscence (requiring surgical exploration or  
28  
29 drainage of pus from the operation wound with or without isolation of organisms)<sup>17</sup> on  
30  
31 the third postoperative day. There was no difference in the incidence of  
32  
33 postoperative morbidities between groups according to the *a priori* Bonferroni-  
34  
35 correction P value criterion (Figure 1). Patients with a postoperative morbidity were  
36  
37 twice as likely to be a failure ( $RR_{unadjusted}$  2.36, 95% CI, 1.13 to 4.91) than those  
38  
39 without. There was no difference in the mean EQ-5D index between failure ( $0.53 \pm$   
40  
41  $0.30$ ) and successful enhanced recovery groups ( $0.63 \pm 0.29$ ) ( $P = 0.166$ ).  
42  
43  
44  
45  
46  
47  
48  
49  
50  
51  
52  
53  
54  
55  
56  
57  
58  
59  
60

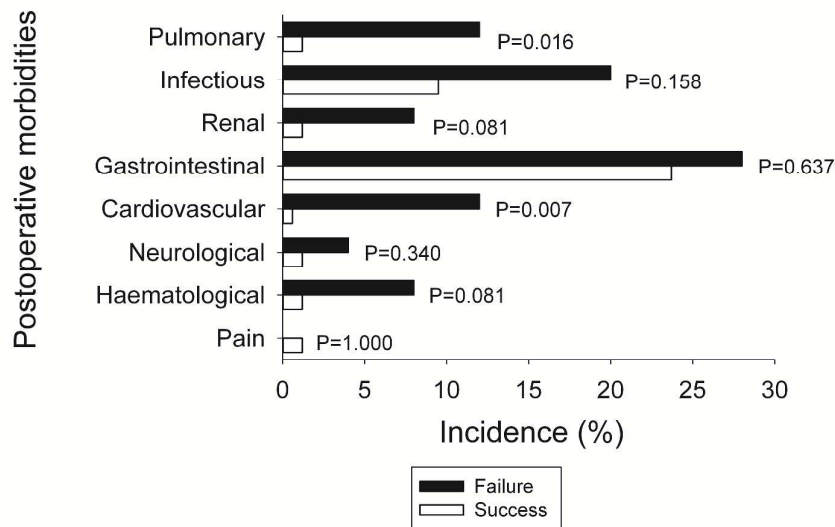

After adjusting for planned postoperative ICU care, current smoking, high preoperative alanine transaminase/glutamic-pyruvic transaminase concentration and postoperative morbidities on the third day after surgery were significant risk factors associated with failure of enhanced recovery protocol (Table 3). The GEE model had adequate calibration (Hosmer-Lemeshow goodness-of-fit  $\chi^2$  8df,  $P=0.352$ ) and excellent discrimination (AUROC = 0.87, 95% CI, 0.83 to 0.92).

Table 3 Risk factors for failure in enhanced recovery protocol after major hepatobiliary and pancreatic surgery using the generalized estimating equation model

|                             | Common-effect RR (95% CI) | P value |
|-----------------------------|---------------------------|---------|
| ICU admission               |                           |         |
| None                        | 1.00                      |         |
| Elective                    | 0.41 (0.14 – 1.20)        | 0.104   |
| Smoking status              |                           |         |
| Never-smoker/Exsmoker       | 1.00                      |         |
| Current smoker              | 2.21 (1.10 – 4.46)        | 0.027   |
| ALT/GPT(IU/L)*              |                           |         |
| Normal                      | 1.00                      |         |
| High                        | 3.55 (1.68 – 7.49)        | 0.001   |
| Any postoperative morbidity |                           |         |
| None                        | 1.00                      |         |
| Present on Day 3            | 2.69 (1.30 – 5.56)        | 0.007   |

\* High Alanine transaminase/glutamic-pyruvic transaminase defined as more than 67 IU/L in males and more than 55 IU/L in females

The results of a sensitivity analysis on the main GEE model using adjusted urinary cotinine concentration instead of smoking status are shown Table 4. Compared to patients with nil urinary cotinine concentration, the predicted adjusted risk for failure in enhanced recovery protocol in patients with urinary cotinine concentrations of 50, 500 and 1500 ng/ml were 1.04 (95% CI, 1.01 to 1.07), 1.52 (95% CI, 1.22 to 1.90) and 3.51 (95% CI, 1.80 to 6.83) respectively. The GEE model had adequate calibration (Hosmer-Lemeshow goodness-of-fit  $\chi^2$  8df, P=0.496) and excellent discrimination (AUROC = 0.87, 95% CI, 0.82 to 0.91).

Table 4. Sensitivity analysis on the risk factors for failure in enhanced recovery protocol after major hepatobiliary and pancreatic surgery

|                                          | Common-effect RR (95% CI) | P value |
|------------------------------------------|---------------------------|---------|
| ICU admission                            |                           |         |
| None                                     | 1.000                     |         |
| Elective                                 | 0.505 (0.176 – 1.444)     | 0.202   |
| Adjusted cotinine concentration (ng/ml)* | 1.001 (1.000 – 1.001)     | <0.001  |
| ALT/GPT(IU/L)†                           |                           |         |
| Normal                                   | 1.000                     |         |
| High                                     | 4.626 (2.097 – 10.207)    | <0.001  |
| Any postoperative morbidity              |                           |         |
| None                                     | 1.000                     |         |
| Present on Day 3                         | 2.657 (1.312 – 5.379)     | 0.007   |

\*Active smokers commonly defined as urinary cotinine concentration >50ng/ml<sup>21</sup>

†High Alanine transaminase/glutamic-pyruvic transaminase defined as more than 67 IU/L in males and more than 55 IU/L in females

## DISCUSSION

Our management of patients undergoing HBP surgery incorporated a small proportion of evidence-based components described in ERAS programs for hepatic<sup>4</sup> and pancreatic<sup>22</sup> surgery. For every eight patients undergoing major HBP surgery, one was at risk of failing enhanced recovery protocols in major HBP surgery.

However, no patients died within 30 days after surgery. This may be due to the majority of our patients (86%) classified as American Society of Anesthesiologists' physical status grades I and II, benefits of planned bundles of care in the ERAS program or good access to postoperative ICU care. Prolonged stay in ICU (12%) and hospital readmissions (6%) were the most common failure events. Our hospital

1  
2  
3 readmission rate and 30-day mortality are within the range described in studies  
4 included in recent systematic reviews of fast-track liver resection and pancreatic  
5 surgery.<sup>1;2;22;23</sup> Our patients who failed enhanced recovery protocols after major HBP  
6  
7  
8 surgery had clinically significantly longer ICU stays and postoperative stays in  
9  
10  
11 hospital.  
12

13  
14  
15  
16 **Access to ICU admission after surgery affects outcomes.**<sup>24</sup> Under half (48.5%) of our  
17  
18 patients had elective ICU admission after surgery. Patients with elective ICU  
19  
20 admissions after surgery were high-risk patients as suggested by the results of the  
21  
22 univariate analysis where they were 1.5 times more likely to be failures than patients  
23  
24 sent to the ward after surgery. However, when the elective ICU admission variable  
25  
26 was included in the GEE models, the common-effect relative risk, although not  
27  
28 significant, suggested a possible protective effect on failure. A previous study  
29  
30 showed that intensive care physician staffing was associated with better outcomes  
31  
32 after hepatic resection from prompt diagnosis and treatment of nonsurgical  
33  
34 complications.<sup>7</sup> Our incidence of ICU readmission (2.1%) within 24 h appears  
35  
36 acceptable. Previous studies included in systematic reviews of fast-track HBP  
37  
38 surgery<sup>1;2;22;23</sup> have not reported the rate of ICU readmissions.  
39  
40  
41  
42  
43  
44

45  
46 There is a paucity of studies examining the effect of smoking on fast-track surgery.  
47  
48 Compared to conventional care programs, smoking was associated with 30-day  
49  
50 hospital readmissions (odds ratio 1.60, 95% CI, 1.05 to 2.44), but not with prolonged  
51  
52 length of hospital stay of more than 4 days (odds ratio 1.34, 95% CI, 0.92 to 1.95) in  
53  
54 patients undergoing fast-track hip and knee arthroplasty.<sup>25</sup> However, current smoking  
55  
56 was based on self-reported smoking history up to a month before hospital<sup>25</sup> and the  
57  
58  
59  
60

1  
2  
3 effect of smoking on enhanced recovery failure is likely to be underestimated as  
4  
5 many smokers (17%) deny smoking before elective surgery.<sup>26</sup> In contrast, we used  
6  
7 both self-reported smoking history and adjusted urinary cotinine concentration to  
8  
9 increase the accuracy of preoperative smoking status data. We have shown that  
10  
11 current smokers were up to four times more likely to be enhanced recovery failures  
12  
13 compared to never-smokers and former smokers in the GEE model. **The results of**  
14  
15 **the sensitivity analysis using adjusted urinary cotinine concentration further**  
16  
17 **strengthens the association between smoking and the risk of enhanced recovery**  
18  
19 **failure.** Thus, smoking cessation before HBP surgery would be expected to decrease  
20  
21 the risk of enhanced recovery failures substantially. Smoking cessation at least 4  
22  
23 weeks, and preferably 8 weeks, before surgery significantly reduced the risk of  
24  
25 postoperative respiratory and wound-healing complications.<sup>27</sup> Smoking is a  
26  
27 modifiable risk factor that surgeons and anaesthesiologists can work on when  
28  
29 patients are booked for surgery.  
30  
31  
32  
33  
34  
35

36  
37 Of all the preoperative liver function and coagulation tests performed, high alanine  
38  
39 transaminase/glutamic-pyruvic transaminases (ALT/GPT) concentration was the only  
40  
41 independent biochemical risk factor associated with enhanced recovery failures. The  
42  
43 strong association is indicative of the high risk of operating on an acutely inflamed  
44  
45 liver.<sup>28</sup> A previous study<sup>29</sup> found that alanine aminotransferase  $\geq 70$  IU/L was an  
46  
47 independent risk factor (odd ratio 2.02, 95% CI, 1.33 to 3.07) for postoperative  
48  
49 complications after hepatic resection for hepatocellular carcinoma.  
50  
51

52  
53  
54 Fast-track open liver resection was associated with a reduction in general  
55  
56 complications as defined by the Postoperative Morbidity Survey<sup>17</sup> by 36% (95% CI  
57  
58  
59  
60



1  
2  
3 16% to 52%).<sup>19</sup> A direct comparison between our incidence of postoperative  
4  
5 morbidities on the third day after surgery and Jones et al.'s study<sup>19</sup> is difficult as the  
6  
7 timing of their postoperative morbidities was not specified. Our GEE model found  
8  
9 that patients with any postoperative morbidity on the third day after surgery were  
10  
11 three times more likely to be an enhanced recovery failure than patients without  
12  
13 reported postoperative morbidity. Specifically, after adjustment for multiple testing,  
14  
15 cardiovascular events (diagnostic tests or treatment in last 24 h for new myocardial  
16  
17 infarction or ischaemia, hypotension, arrhythmias, cardiogenic pulmonary oedema or  
18  
19 thrombotic events)<sup>17</sup> was weakly associated with the risk of failure. **Early**  
20  
21 **postoperative morbidities are associated with longer duration of hospital stay<sup>30</sup> and**  
22  
23 **an increased risk of hospital readmission.<sup>31</sup>**  
24  
25  
26  
27  
28

29  
30 Using a minimal important difference of 0.03,<sup>32</sup> we found that patients in the  
31  
32 enhanced recovery failure group had lower health-related quality of life than in the  
33  
34 successful group. Our health-related quality of life on the third day after surgery in  
35  
36 the successful group was similar to those reported in the standard care group by  
37  
38 Jones et al.<sup>19</sup> Our practice does not include carbohydrate drink up to 2 hours before  
39  
40 surgery, pharmacological prophylaxis for deep vein thrombosis or the routine use of  
41  
42 epidural anaesthesia.  
43  
44  
45  
46

47  
48 Overall, the results of this study suggest that it is possible to identify a subgroup of  
49  
50 patients requiring additional care to minimize perioperative morbidity and length of  
51  
52 stay. Patients who are smokers, have high ALT/GPT concentration or are at a high  
53  
54 risk of postoperative morbidities are likely to fail enhanced recovery protocol in HBP  
55  
56 surgery. In defining who is at high risk of postoperative morbidities, the American  
57  
58  
59  
60

1  
2  
3 Society of Anesthesiologists' Physical Status grades III and IV and risk more than 50%  
4  
5 estimated in the POSSUM-defined postoperative morbidity model may be useful as  
6  
7 surrogate markers.<sup>17</sup> For those patients at high risk of HBP surgery failure, elective  
8  
9 postoperative ICU admission and measures targeted to avoid postoperative  
10  
11 cardiorespiratory complications are warranted to reduce the risk of failure of  
12  
13 enhanced recovery events.  
14  
15

16  
17  
18 There are several limitations of this study. First, we did not measure the compliance  
19  
20 rate of individual components of the ERAHBPS program. Recent studies suggest  
21  
22 that better patient care and outcome can be achieved regardless of the number, the  
23  
24 combination, the type, and the strength of evidence of the individual ERAS  
25  
26 component.<sup>33;34</sup> Second, the common-effects GEE analysis was influenced by the  
27  
28 higher frequencies of prolonged ICU length of stay (12%) and hospital readmissions  
29  
30 (6%) events than other components included in the definition of failure. Our sample  
31  
32 size was small for the use an average relative-effect GEE analysis<sup>20</sup> to address this  
33  
34 problem. There is a potential for residual confounding despite the use of multivariate  
35  
36 analyses in this cohort study. The applicability of the identified risk factors to select  
37  
38 patients suitable for ERAHBPS programs in other settings requires further validation.  
39  
40  
41 Finally, the failure outcomes were limited to the early to intermediate phases of  
42  
43 recovery; we did not measure outpatient complications<sup>31</sup> or late recovery outcomes,  
44  
45 such as functional status and health-related quality of life beyond one month as  
46  
47 recommended recently by Neville et al.<sup>35</sup>  
48  
49  
50  
51

52  
53  
54 In conclusion, patients who smoked, had elevated preoperative ALT/GPT or  
55  
56 experienced postoperative morbidities were at risk of failing enhanced recovery  
57  
58  
59  
60

1  
2  
3 protocols in major HBP surgery and may benefit from additional care. Patients who  
4  
5 failed enhanced recovery protocols in HBP surgery stayed in ICU and in the hospital  
6  
7 longer.  
8  
9

## 10 11 **Acknowledgements**

12  
13  
14 **Funding Support:** The work was substantially supported by the Health and Health  
15  
16 Services Research Fund, Food and Health Bureau, Hong Kong SAR Government  
17  
18 (Grant number: 08090311). The funding source had no role in the design, conduct or  
19  
20 analysis of the study, or in the decision to submit the manuscript for publication.  
21  
22

23 **Competing Interests:** None declared.  
24

25 **Ethics approval:** The Joint Chinese University of Hong Kong-New Territories East  
26  
27 Cluster Clinical Research Ethics Committee approved this cohort study of patients  
28  
29 undergoing major HBP surgery at the Prince of Wales Hospital in Hong Kong  
30  
31 between January 2011 and November 2012 (CRE-2013.181).  
32  
33

34 **Contributors:** AL performed the statistical analyses and had full access to all the  
35  
36 data in the study. AL drafted the manuscript and made substantial revisions. All  
37  
38 authors were involved in the study concept and design of the study. CHC collected  
39  
40 the data. AL, MWAC, CDC, KFL, YSC and BSPL interpreted the data. All authors  
41  
42 made critical revisions of the manuscript for important intellectual content and  
43  
44 approved the final version of the manuscript. AL is guarantor.  
45  
46

47 **Data sharing:** No additional data available  
48

49 **Provenance and peer review:** Not commissioned, externally peer reviewed.  
50  
51  
52  
53  
54  
55  
56  
57  
58  
59  
60

## References

- (1) Spelt L, Ansari D, Stureson C, Tingstedt B, Andersson R. Fast-track programmes for hepatopancreatic resections: where do we stand? *HPB (Oxford)* 2011; 13(12):833-838.
- (2) Hall TC, Dennison AR, Bilku DK, Metcalfe MS, Garcea G. Enhanced recovery programmes in hepatobiliary and pancreatic surgery: a systematic review. *Ann R Coll Surg Engl* 2012; 94(5):318-326.
- (3) Lin DX, Li X, Ye QW, Lin F, Li LL, Zhang QY. Implementation of a fast-track clinical pathway decreases postoperative length of stay and hospital charges for liver resection. *Cell Biochem Biophys* 2011; 61(2):413-419.
- (4) Wong-Lun-Hing EM, van Dam RM, Heijnen LA, Busch OR, Terkivatan T, van HR et al. Is Current Perioperative Practice in Hepatic Surgery Based on Enhanced Recovery After Surgery (ERAS) Principles? *World J Surg* 2013.
- (5) Schultz NA, Larsen PN, Klarskov B, Plum LM, Frederiksen HJ, Christensen BM et al. Evaluation of a fast-track programme for patients undergoing liver resection. *Br J Surg* 2013; 100(1):138-143.
- (6) Sanchez-Perez B, Aranda-Narvaez JM, Suarez-Munoz MA, Eladel-Delfresno M, Fernandez-Aguilar JL, Perez-Daga JA et al. Fast-track program in laparoscopic liver surgery: Theory or fact? *World J Gastrointest Surg* 2012; 4(11):246-250.
- (7) Dimick JB, Pronovost PJ, Lipsett PA. The Effect of ICU Physician Staffing and Hospital Volume on Outcomes After Hepatic Resection. *J Intens Care Med* 2002; 17:41-47.
- (8) Constantinides VA, Tekkis PP, Fazil A, Kaur K, Leonard R, Platt M et al. Fast-track failure after cardiac surgery: development of a prediction model. *Crit Care Med* 2006; 34(12):2875-2882.
- (9) Lee A, Zhu F, Underwood MJ, Gomersall CD. Fast-track failure after cardiac surgery: external model validation and implications to ICU bed utilization. *Crit Care Med* 2013; 41(5):1205-1213.
- (10) Lee A, Chui PT, Chiu CH, Tan PE, Tam TP, Samy W et al. Risk of perioperative respiratory complications and postoperative morbidity in a cohort of adults exposed to passive smoking. *Ann Surg* 2014; Feb 6 [epub ahead].
- (11) Lee KF, Cheung YS, Chong CN, Tsang YY, Ng WW, Ling E et al. Laparoscopic versus open hepatectomy for liver tumours: a case control study. *Hong Kong Med J* 2007; 13(6):442-448.
- (12) Lee KF, Cheung YS, Wong J, Chong CC, Wong JS, Lai PB. Randomized clinical trial of open hepatectomy with or without intermittent Pringle manoeuvre. *Br J Surg* 2012; 99(9):1203-1209.

- 1  
2  
3 (13) Shontz R, Karuparth V, Temple R, Brennan TJ. Prevalence and risk factors  
4 predisposing to coagulopathy in patients receiving epidural analgesia for  
5 hepatic surgery. *Reg Anesth Pain Med* 2009; 34(4):308-311.  
6  
7 (14) Maessen JM, Dejong CH, Kessels AG, von Meyenfeldt MF. Length of stay: an  
8 inappropriate readout of the success of enhanced recovery programs. *World J*  
9 *Surg* 2008; 32(6):971-975.  
10  
11 (15) Reynolds PQ, Sanders NW, Schildcrout JS, Mercaldo ND, St Jacques PJ.  
12 Expansion of the surgical Apgar score across all surgical subspecialties as a  
13 means to predict postoperative mortality. *Anesthesiology* 2011; 114(6):1305-  
14 1312.  
15  
16 (16) Knaus WA, Draper EA, Wagner DP, Zimmerman JE. APACHE II: a severity of  
17 disease classification system. *Crit Care Med* 1985; 13(10):818-829.  
18  
19 (17) Grocott MP, Browne JP, Van der Meulen J, Matejowsky C, Mutch M, Hamilton  
20 MA et al. The Postoperative Morbidity Survey was validated and used to  
21 describe morbidity after major surgery. *J Clin Epidemiol* 2007; 60(9):919-928.  
22  
23 (18) Shaw JW, Johnson JA, Coons SJ. US valuation of the EQ-5D health states:  
24 development and testing of the D1 valuation model. *Med Care* 2005;  
25 43(3):203-220.  
26  
27 (19) Jones C, Kelliher L, Dickinson M, Riga A, Worthington T, Scott MJ et al.  
28 Randomized clinical trial on enhanced recovery versus standard care  
29 following open liver resection. *Br J Surg* 2013; 100(8):1015-1024.  
30  
31 (20) Mascha EJ, Sessler DI. Statistical grand rounds: design and analysis of  
32 studies with binary- event composite endpoints: guidelines for anesthesia  
33 research. *Anesth Analg* 2011; 112(6):1461-1471.  
34  
35 (21) SRNT Subcommittee on biochemical verification. Biochemical verification of  
36 tobacco use and cessation. *Nicotine Tob Res* 2002; 4(2):149-159.  
37  
38 (22) Coolsen MM, van Dam RM, van der Wilt AA, Slim K, Lassen K, Dejong CH.  
39 Systematic review and meta-analysis of enhanced recovery after pancreatic  
40 surgery with particular emphasis on pancreaticoduodenectomies. *World J*  
41 *Surg* 2013; 37(8):1909-1918.  
42  
43 (23) Coolsen MM, Wong-Lun-Hing EM, van Dam RM, van der Wilt AA, Slim K,  
44 Lassen K et al. A systematic review of outcomes in patients undergoing liver  
45 surgery in an enhanced recovery after surgery pathways. *HPB (Oxford)* 2013;  
46 15(4):245-251.  
47  
48 (24) Pearse RM, Moreno RP, Bauer P, Pelosi P, Metnitz P, Spies C et al. Mortality  
49 after surgery in Europe: a 7 day cohort study. *Lancet* 2012; 380(9847):1059-  
50 1065.  
51  
52 (25) Jorgensen CC, Kehlet H. Outcomes in smokers and alcohol users after fast-  
53 track hip and knee arthroplasty. *Acta Anaesthesiol Scand* 2013; 57(5):631-  
54 638.  
55  
56  
57  
58  
59  
60

- 1  
2  
3 (26) Lee A, Gin T, Chui PT, Tan PE, Chiu CH, Tam TP et al. The accuracy of  
4 urinary cotinine immunoassay test strip as an add-on test to self-reported  
5 smoking before major elective surgery. *Nicotine Tob Res* 2013; 15(10):1690-  
6 1695.  
7  
8 (27) Wong J, Lam DP, Abrishami A, Chan MT, Chung F. Short-term preoperative  
9 smoking cessation and postoperative complications: a systematic review and  
10 meta-analysis. *Can J Anaesth* 2012; 59(3):268-279.  
11  
12 (28) Schroeder RA, Marroquin CE, Bute BP, Khuri S, Henderson WG, Kuo PC.  
13 Predictive indices of morbidity and mortality after liver resection. *Ann Surg*  
14 2006; 243(3):373-379.  
15  
16 (29) Taketomi A, Kitagawa D, Itoh S, Harimoto N, Yamashita Y, Gion T et al.  
17 Trends in morbidity and mortality after hepatic resection for hepatocellular  
18 carcinoma: an institute's experience with 625 patients. *J Am Coll Surg* 2007;  
19 204(4):580-587.  
20  
21 (30) Davies SJ, Francis J, Dille J, Wilson RJ, Howell SJ, Allgar V. Measuring  
22 outcomes after major abdominal surgery during hospitalization: reliability and  
23 validity of the Postoperative Morbidity Survey. *Perioper Med (Lond)* 2013;  
24 2(1):1.  
25  
26 (31) Lucas DJ, Sweeney JF, Pawlik TM. The timing of complications impacts risk  
27 of readmission after hepatopancreatobiliary surgery. *Surgery* 2014;  
28 155(5):945-953.  
29  
30 (32) Barton GR, Sach TH, Doherty M, Avery AJ, Jenkinson C, Muir KR. An  
31 assessment of the discriminative ability of the EQ-5Dindex, SF-6D, and EQ  
32 VAS, using sociodemographic factors and clinical conditions. *Eur J Health*  
33 *Econ* 2008; 9(3):237-249.  
34  
35 (33) Gianotti L, Beretta S, Luperto M, Bernasconi D, Valsecchi MG, Braga M.  
36 Enhanced recovery strategies in colorectal surgery: is the compliance with the  
37 whole program required to achieve the target? *Int J Colorectal Dis* 2014;  
38 29(3):329-341.  
39  
40 (34) Nicholson A, Lowe MC, Parker J, Lewis SR, Alderson P, Smith AF.  
41 Systematic review and meta-analysis of enhanced recovery programmes in  
42 surgical patients. *Br J Surg* 2014; 101(3):172-188.  
43  
44 (35) Neville A, Lee L, Antonescu I, Mayo NE, Vassiliou MC, Fried GM et al.  
45 Systematic review of outcomes used to evaluate enhanced recovery after  
46 surgery. *Br J Surg* 2014; 101(3):159-171.  
47  
48  
49  
50  
51  
52  
53  
54  
55  
56  
57  
58  
59  
60

1  
2  
3 Figure 1. The incidence of postoperative morbidities on the third day after surgery by  
4 enhanced recovery protocol groups. To control for type I error at 0.05 from multiple  
5 comparisons,  $P < 0.0063$  was considered significant  
6  
7  
8  
9  
10  
11  
12  
13  
14  
15  
16  
17  
18  
19  
20  
21  
22  
23  
24  
25  
26  
27  
28  
29  
30  
31  
32  
33  
34  
35  
36  
37  
38  
39  
40  
41  
42  
43  
44  
45  
46  
47  
48  
49  
50  
51  
52  
53  
54  
55  
56  
57  
58  
59  
60

For peer review only
